# Supplementary material for: Metformin modulates the gut microbiome in a mice model of high-fat diet-induced glycolipid metabolism disorder
Source: HighWire-hosted journal article supplement (doi:10.1136/bmjdrc-2022-003149), 2022-12-01
Supplement: bmjdrc-2022-003149supp005_data_supplement.xlsx [file bmjdrc-2022-003149supp005_data_supplement.xlsx]

## Sheet: Sheet1
Additional file 5-1 Rank-sum test on KO abundance
taxon name	median(MC)	median(MET)	median(NC)	pvalue	fdr	enrich
K00186	0	6.24056e-07	5.04434e-07	0.00638069	0.0122672	MET
K00183	1.06856e-07	1.84184e-07	0	0.0194619	0.0306948	MET
K00180	0.000159604	0.000171158	0.000116774	0.000744722	0.00304008	MET
K10111	2.13496e-07	1.07483e-06	0	0.00216944	0.00575641	MET
K10112	8.631e-05	9.78568e-05	0.000154349	0.0270518	0.0406343	NC
K17810	2.1264e-05	1.79345e-05	6.91374e-06	0.00206526	0.00559116	MC
K19267	9.65772e-07	1.5887e-06	0	0.000323714	0.00249255	MET
K12529	2.10674e-07	7.87556e-07	0	0.000890357	0.00334242	MET
K00331	0.000244215	0.000183586	0.000180663	0.00761603	0.0140193	MC
K18326	0	7.72325e-07	0	0.00225025	0.00589712	MET
K18324	1.10116e-06	9.4843e-07	2.41135e-08	0.000454695	0.00249255	MC
K05846	1.2181e-05	1.6718e-05	7.24089e-06	0.0262523	0.039599	MET
K05847	4.28293e-05	3.69669e-05	1.71048e-05	0.00464251	0.00967017	MC
K15549	5.25838e-07	2.09754e-06	0	0.0010879	0.0037329	MET
K04087	2.04236e-05	3.51464e-05	4.5735e-05	0.00171644	0.0049695	NC
K04085	0	5.23651e-07	0	0.00744637	0.0138544	MET
K15540	2.1399e-07	1.47043e-06	0	0.00121621	0.00401107	MET
K04088	2.06695e-05	4.23479e-05	5.04774e-05	0.0014337	0.00449655	NC
K15545	1.17333e-07	8.23308e-07	0	0.000343561	0.00249255	MET
K15547	7.29439e-07	1.95554e-06	0	0.000586868	0.00267644	MET
K09789	6.36879e-05	6.73531e-05	1.07814e-05	0.000433985	0.00249255	MET
K00989	1.55353e-05	3.42151e-05	5.54087e-06	0.000961035	0.00350591	MET
K00984	2.73954e-06	3.09151e-07	1.87014e-05	0.000344345	0.00249255	NC
K00982	4.2368e-06	3.19995e-06	7.21166e-07	0.0027326	0.00668479	MC
K00983	3.61622e-05	3.37429e-05	9.66976e-05	0.000451697	0.00249255	NC
K05592	0.000319467	0.000267384	0.000267973	0.00217658	0.0057688	MC
K05593	2.09898e-05	1.69275e-05	4.6484e-05	0.0172922	0.0276651	NC
K18220	5.62082e-05	9.00117e-05	9.65201e-05	0.00152998	0.0046246	NC
K05591	1.9027e-07	7.0713e-07	0	0.00197291	0.00540698	MET
K05596	1.89812e-07	1.10792e-06	0	0.000311616	0.00249255	MET
K05594	1.16208e-07	1.52601e-06	0	0.00525677	0.0105862	MET
K05595	0.000268424	0.000287192	0.000113074	0.000443861	0.00249255	MET
K01295	6.51297e-06	6.56729e-06	1.40716e-06	0.000696112	0.0029446	MET
K01297	0.000127629	6.51955e-05	0.000135408	0.000865243	0.00327978	NC
K05601	7.63787e-05	0.000125225	5.61155e-05	0.00814786	0.0147197	MET
K02926	0.000279043	0.000319112	0.000312961	0.0265162	0.0399582	MET
K16936	1.10281e-06	1.88389e-05	0	3.34183e-05	0.00249255	MET
K15894	0	0	3.09629e-06	0.00017744	0.00249255	NC
K19310	2.52356e-05	1.8449e-05	7.9645e-05	0.000443861	0.00249255	NC
K00216	1.7938e-07	1.73062e-06	0	0.00285555	0.00684922	MET
K00215	0.000336293	0.000306243	0.000290338	0.0221482	0.0342603	MC
K02110	6.10412e-05	6.44116e-05	4.12789e-05	0.023459	0.0359192	MET
K19265	0.000223195	0.000166974	0.000173616	0.0132667	0.0220012	MC
K13938	1.59389e-07	9.55128e-07	0	0.00318278	0.0073985	MET
K00219	6.95472e-07	2.40974e-06	3.06707e-08	0.00319898	0.00742507	MET
K01740	0.000400291	0.00039505	0.000367389	0.00349123	0.00787636	MC
K01746	1.23457e-05	4.9843e-06	2.59488e-06	0.0270518	0.0406343	MC
K01745	0.000229622	0.000250533	0.000135218	0.000577097	0.00267644	MET
K01744	5.87866e-05	0.000174786	6.66843e-05	0.00131687	0.00423441	MET
K01584	2.31177e-07	2.38758e-06	1.65083e-08	0.000115132	0.00249255	MET
K01586	0.000243804	0.000244449	0.000225573	0.00507972	0.0103954	MET
K01580	8.98336e-05	0.000134067	5.81096e-05	0.000970693	0.00350591	MET
K01583	0	0	4.15755e-07	0.000555953	0.00267644	NC
K01582	2.53905e-06	4.13405e-06	6.36842e-08	0.00035485	0.00249255	MET
K12660	2.22148e-07	1.00168e-06	0	0.00129767	0.00421425	MET
K01589	1.25092e-05	2.87206e-05	2.77927e-05	0.00515649	0.0104156	MET
K18138	7.91177e-05	0.000160594	2.39086e-05	0.00013776	0.00249255	MET
K13654	7.91868e-08	6.65921e-07	0	0.0250237	0.0379172	MET
K13652	4.67784e-05	5.17526e-05	1.24514e-05	0.00144088	0.00450698	MET
K13653	9.09069e-05	9.31963e-05	0.000169131	0.0249097	0.0378276	NC
K13650	7.95516e-08	6.92252e-07	0	0.0020938	0.0056462	MET
K02046	2.96131e-06	2.4587e-06	1.75225e-05	0.0034221	0.00775411	NC
K08348	1.63766e-07	9.19547e-07	0	0.00197291	0.00540698	MET
K08349	0	6.22013e-07	0	0.00932194	0.0164712	MET
K02456	6.97837e-07	6.23484e-06	2.42117e-07	0.000727576	0.00301132	MET
K18446	2.52938e-07	9.93926e-07	0	0.00100523	0.00357929	MET
K02454	1.6851e-05	5.33911e-05	9.44408e-06	0.000288014	0.00249255	MET
K02455	1.6104e-07	1.53975e-06	0	0.000109958	0.00249255	MET
K02100	1.09772e-07	9.4313e-07	0	0.00748669	0.0138762	MET
K02450	2.39627e-07	5.17474e-06	1.15926e-07	0.0025247	0.00635942	MET
K03457	2.46061e-06	3.54871e-06	5.2419e-07	0.00238156	0.00615829	MET
K03451	1.12997e-05	3.42935e-05	2.44234e-05	0.000905068	0.00338675	MET
K02109	0.000212857	0.000104728	0.000251727	0.00041282	0.00249255	NC
K03453	0.000178319	0.000157586	9.79498e-05	0.000349153	0.00249255	MC
K03980	8.20528e-06	3.82296e-05	6.66562e-06	0.000717312	0.00298029	MET
K02193	6.04358e-06	2.05763e-05	5.29471e-06	0.0311949	0.0461452	MET
K13935	0	1.54238e-06	4.39309e-07	0.000155313	0.00249255	MET
K01639	0.000261946	0.000220045	6.43743e-05	0.000205513	0.00249255	MC
K01638	8.354e-07	2.78808e-06	0	0.000192591	0.00249255	MET
K01637	2.6574e-07	9.09372e-07	0	0.00047051	0.00252271	MET
K01635	7.03169e-06	5.96515e-06	2.01634e-06	0.0280856	0.0420248	MC
K03501	0.000347665	0.000250786	0.000271617	0.0114187	0.0194123	MC
K01631	3.59089e-07	1.15193e-06	0	0.00131838	0.00423441	MET
K20451	0	0	8.31474e-07	0.00238377	0.00616061	NC
K03851	7.2448e-07	0	0	0.000265509	0.00249255	MC
K09937	0	3.05715e-07	0	0.01054	0.0182182	MET
K03852	0	1.56096e-05	4.7862e-06	0.000754073	0.00307191	MET
K08485	0	1.39014e-06	0	0.00600287	0.0117692	MET
K03856	5.0345e-05	7.03635e-05	2.26254e-05	0.000617396	0.00276145	MET
K02196	1.69331e-07	7.25907e-07	0	0.00771256	0.014119	MET
K03521	0.000330356	0.000297374	0.000279644	0.00204983	0.005572	MC
K13019	8.10025e-07	1.4968e-06	3.91233e-06	0.00706572	0.013241	NC
K14057	1.56478e-07	6.74675e-07	0	0.0250237	0.0379172	MET
K03522	0.000330935	0.000250317	0.000265194	0.00555809	0.0110972	MC
K14051	8.94445e-08	6.90434e-07	0	0.00378712	0.00831356	MET
K03527	0.000229581	0.000174657	0.000240817	0.00338805	0.00769188	NC
K03526	0.000308055	0.000312558	0.000252759	0.0026852	0.00661735	MET
K02853	4.66279e-07	1.39369e-06	0	0.00152476	0.00461479	MET
K13012	2.47269e-06	7.32174e-06	8.88893e-06	0.00591656	0.0116584	NC
K02851	1.87137e-05	2.58006e-05	1.27542e-05	0.0198908	0.031213	MET
K02584	6.10441e-06	5.76285e-05	1.27677e-05	0.00790705	0.0144186	MET
K03459	0	7.1633e-07	0	0.00313113	0.00731119	MET
K04026	5.56495e-06	5.86978e-06	1.50058e-06	0.000396633	0.00249255	MET
K18916	5.15893e-06	0	0	1.839e-05	0.00249255	MC
K03670	3.27532e-08	8.89387e-07	0	0.00839862	0.0151552	MET
K03673	5.25101e-07	1.79591e-06	0	0.000207642	0.00249255	MET
K03675	3.56813e-07	1.01505e-06	0	0.00361636	0.00808444	MET
K07719	7.46991e-07	3.02872e-07	0	0.000979411	0.00353466	MC
K09765	0.000118835	0.000128138	7.67824e-05	0.0147354	0.0241624	MET
K09767	4.30519e-07	4.89658e-06	2.17076e-06	0.00482078	0.00996593	MET
K09769	3.00431e-05	8.13794e-05	2.30997e-05	0.00247256	0.00625169	MET
K09768	3.09818e-06	1.2639e-05	6.39751e-06	0.00918669	0.0162877	MET
K18320	4.20183e-07	2.14452e-06	0	0.00122823	0.00404218	MET
K13275	5.06831e-07	8.54686e-07	0	0.000376787	0.00249255	MET
K04082	1.80643e-07	8.2822e-07	0	0.000711718	0.00297124	MET
K03892	4.66437e-05	6.68738e-05	2.17378e-05	0.0211207	0.0328451	MET
K03299	6.05845e-05	3.52313e-05	5.90254e-06	0.000243596	0.00249255	MC
K13053	2.17353e-07	1.06575e-06	0	0.00192429	0.00531743	MET
K01788	8.23723e-05	5.91506e-05	2.97196e-05	0.00871683	0.0155908	MC
K03293	1.93173e-06	1.05828e-06	1.17993e-07	0.00693249	0.0130966	MC
K03292	0.00019267	0.000134007	0.000270124	0.000349153	0.00249255	NC
K03291	6.21626e-07	3.99144e-06	0	0.000376787	0.00249255	MET
K03290	5.76657e-07	1.41738e-06	0	0.00146045	0.00452358	MET
K03297	2.47414e-06	6.48162e-07	2.19118e-07	0.00184691	0.00521467	MC
K03296	0.00016401	0.000256297	9.04175e-05	0.000243596	0.00249255	MET
K03294	0.00016969	0.000161874	1.68864e-05	0.000322309	0.00249255	MC
K03073	2.69218e-05	4.00445e-05	1.52265e-05	0.00112497	0.00380719	MET
K03072	9.3066e-06	2.87186e-05	1.42524e-05	0.00417977	0.00896624	MET
K03071	4.41909e-06	8.52984e-06	5.36144e-07	0.000283018	0.00249255	MET
K03077	5.80718e-05	2.46823e-05	0.000119528	0.000105955	0.00249255	NC
K03074	9.11559e-06	4.39118e-05	1.02941e-05	0.00430706	0.00916081	MET
K08965	0	0	1.2866e-06	1.839e-05	0.00249255	NC
K03079	1.0831e-05	1.44628e-05	5.50333e-06	0.00632972	0.0121997	MET
K00556	1.72652e-05	6.63713e-05	4.33503e-05	0.000243596	0.00249255	MET
K08961	2.29358e-05	1.41075e-05	5.56807e-06	0.00125892	0.00411706	MC
K08963	8.68634e-05	7.83824e-05	2.66683e-05	0.00178203	0.00512129	MC
K03276	8.95135e-08	5.86315e-07	0	0.00458629	0.00958727	MET
K03270	0.000232283	0.000178808	0.00015585	0.0162445	0.0262135	MC
K04653	7.26898e-06	7.66162e-06	1.25247e-06	0.00421123	0.00900891	MET
K19803	1.05449e-07	1.3035e-06	0	0.00148826	0.00455219	MET
K02745	6.16661e-06	1.05841e-05	1.6102e-06	0.00228246	0.00597149	MET
K13930	0	1.66341e-06	3.64001e-07	0.00365737	0.00813984	MET
K05540	5.94116e-06	3.5728e-05	8.93835e-06	0.000283018	0.00249255	MET
K06131	0.000445974	0.000382405	0.000366786	0.00114483	0.00385462	MC
K02278	1.14653e-06	3.44013e-07	0	0.0116058	0.0196659	MC
K17489	0	1.84409e-06	2.78386e-07	0.00331021	0.00757971	MET
K06132	1.58438e-07	3.22729e-07	0	0.000851399	0.00326491	MET
K03187	3.74808e-05	1.8903e-05	7.19986e-05	6.50731e-05	0.00249255	NC
K03186	8.9602e-06	2.93531e-05	1.18066e-05	0.00214954	0.00574277	MET
K03185	2.96581e-07	1.42653e-06	0	0.000177706	0.00249255	MET
K03184	3.78349e-07	1.52148e-06	0	0.00191958	0.00531743	MET
K03183	0.000276898	0.000226642	0.000225552	0.00680566	0.012925	MC
K03182	1.07006e-05	2.51527e-05	8.92288e-06	0.00194986	0.00537534	MET
K03181	5.83296e-07	1.09345e-06	0	0.00246805	0.00625169	MET
K03189	4.06689e-05	2.76672e-05	0.00011422	0.000169951	0.00249255	NC
K03188	4.0469e-05	3.19212e-05	0.000145788	0.000205513	0.00249255	NC
K16850	1.52366e-05	1.47453e-05	3.69631e-06	0.00319075	0.00740964	MC
K02834	0.000154697	0.000168565	0.000200311	0.0265162	0.0399582	NC
K07220	1.95098e-05	5.22744e-05	1.81319e-07	8.48967e-05	0.00249255	MET
K20117	4.08807e-07	1.01146e-06	0	0.000682078	0.00289836	MET
K20116	2.74752e-05	2.74804e-05	9.89111e-06	0.00918669	0.0162877	MET
K07192	8.19966e-05	0.00015079	6.79052e-05	0.00180445	0.00512534	MET
K09970	5.06374e-06	2.16765e-06	7.65289e-07	0.00239949	0.0061807	MC
K09740	9.2171e-07	0	0	0.00146141	0.00452358	MC
K09971	4.85173e-06	2.73445e-06	6.33622e-07	0.00166572	0.00489547	MC
K07357	7.47641e-07	2.4266e-06	0	0.000667881	0.00286976	MET
K07354	8.47217e-08	7.31812e-07	0	0.000540978	0.00266327	MET
K07352	0	9.79423e-07	0	0.024916	0.0378276	MET
K09972	3.27367e-07	1.03367e-06	0	0.000279839	0.00249255	MET
K07350	1.901e-07	6.68861e-07	0	0.00686885	0.0129816	MET
K09909	2.56363e-07	9.67666e-07	0	0.00150055	0.00455629	MET
K01101	1.90478e-06	1.11894e-06	0	0.000372707	0.00249255	MC
K12056	5.12512e-07	3.08072e-06	0	0.000779583	0.00309054	MET
K06221	5.8552e-07	2.3095e-06	1.04748e-07	0.000349153	0.00249255	MET
K12058	3.78237e-06	4.04874e-06	3.78316e-07	0.00279479	0.00671381	MET
K09904	0	8.12335e-07	0	0.00268421	0.00661735	MET
K06919	3.09971e-05	4.03524e-05	8.35372e-05	0.00183172	0.00517491	NC
K06918	2.40731e-07	1.07329e-06	0	0.00135466	0.00429772	MET
K06916	2.77322e-07	4.15014e-06	1.92214e-07	0.00173186	0.00501102	MET
K06915	2.65913e-05	3.10895e-05	8.53015e-05	0.000461975	0.00249255	NC
K06911	4.82948e-05	0.000120657	1.54092e-06	0.00013776	0.00249255	MET
K01104	0.000383779	0.000298603	0.000290704	0.0108618	0.018642	MC
K00772	3.47475e-06	1.7997e-05	5.07762e-06	0.00169937	0.00496002	MET
K03078	3.08332e-07	1.46342e-06	0	0.000311616	0.00249255	MET
K19082	0	0	2.39006e-06	1.839e-05	0.00249255	NC
K08984	2.47248e-07	9.27364e-07	0	0.00362688	0.00809633	MET
K06205	4.30914e-07	2.61235e-06	0	0.000728003	0.00301132	MET
K08981	5.54164e-08	3.13077e-07	0	0.00771256	0.014119	MET
K08372	4.27394e-07	6.06033e-07	0	0.0172372	0.027615	MET
K08989	2.46756e-07	5.03243e-07	0	0.00509792	0.010398	MET
K10747	0	0	3.27077e-06	1.839e-05	0.00249255	NC
K10218	0	3.26224e-07	0	0.00261034	0.00648922	MET
K10748	1.81774e-07	7.80265e-07	0	0.00108599	0.0037329	MET
K18831	7.43168e-07	1.44924e-05	2.78705e-05	0.000123102	0.00249255	NC
K01912	0.000260349	0.000367768	0.000101196	0.000169951	0.00249255	MET
K01916	6.43532e-06	2.3309e-05	1.46357e-05	0.000617396	0.00276145	MET
K01915	0.000603386	0.000623195	0.000481791	0.000460821	0.00249255	MET
K02362	3.15148e-07	1.30217e-06	0	0.00120576	0.00399639	MET
K18141	3.96196e-07	1.20319e-06	0	0.00124253	0.00406877	MET
K07774	0	0	1.27923e-07	0.00261034	0.00648922	NC
K07775	0	7.94663e-07	0	0.0131939	0.0220012	MET
K00179	0.000154583	0.000214143	0.000133572	0.00149969	0.00455629	MET
K07777	2.18145e-06	2.21947e-06	3.45198e-08	0.00280022	0.00672341	MET
K07771	4.71663e-07	1.41101e-06	0	0.00108599	0.0037329	MET
K07773	6.63758e-07	1.44654e-06	0	0.00108599	0.0037329	MET
K05939	3.5832e-06	2.09667e-05	3.54259e-06	0.0109163	0.0186873	MET
K00171	4.20538e-06	9.43342e-06	1.25499e-05	0.00603608	0.0117845	NC
K00170	1.45926e-05	2.01656e-05	2.83867e-05	0.0271196	0.0406576	NC
K00177	0.000268469	0.000233216	0.000199936	0.00387775	0.00847804	MC
K07177	3.3923e-06	2.27893e-06	0	0.000300361	0.00249255	MC
K07175	5.06013e-05	4.93288e-05	1.06854e-05	0.000457378	0.00249255	MC
K07172	0	1.27435e-06	1.43608e-06	0.00678984	0.0129159	NC
K07173	0.000135448	0.000141383	0.000197951	0.00262546	0.00651136	NC
K07170	4.98758e-05	5.99836e-05	2.91003e-06	0.000377289	0.00249255	MET
K00374	3.09295e-07	9.54708e-07	0	0.00108588	0.0037329	MET
K00371	3.03821e-07	3.33989e-06	5.25806e-07	0.000738688	0.00303697	MET
K00370	4.28465e-06	3.83564e-06	8.67093e-07	0.00278781	0.00671381	MC
K00373	1.22705e-07	9.25154e-07	0	0.00511901	0.0104132	MET
K00372	1.99828e-06	2.58181e-06	1.27324e-07	0.0034221	0.00775411	MET
K01358	0.00038324	0.000326782	0.000386122	0.00626673	0.0121133	NC
K00194	2.64458e-06	5.25543e-06	5.13043e-06	0.0132667	0.0220012	MET
K00196	2.09674e-05	3.47516e-05	9.99417e-06	0.00675481	0.0128598	MET
K09163	4.12823e-06	1.11606e-05	1.036e-05	0.0223149	0.0344612	MET
K09161	1.86801e-07	1.19574e-06	0	0.00458629	0.00958727	MET
K14623	3.34697e-05	9.31937e-05	5.24679e-05	0.00169937	0.00496002	MET
K01354	1.28828e-07	4.90192e-07	0	0.000343561	0.00249255	MET
K03806	3.67081e-07	3.93574e-06	4.91531e-07	0.00323907	0.00749576	MET
K10109	4.70933e-07	1.16447e-06	0	0.000586868	0.00267644	MET
K10108	2.15687e-07	7.10135e-07	0	0.00155482	0.00466048	MET
K10107	2.68087e-07	7.67115e-07	2.26359e-06	0.0104359	0.0181174	NC
K15555	3.66363e-05	2.85508e-05	4.62431e-06	0.000408712	0.00249255	MC
K15554	1.5196e-05	1.83653e-05	1.44425e-06	0.000696112	0.0029446	MET
K15553	1.14353e-05	1.19664e-05	5.29524e-07	0.000457378	0.00249255	MET
K15552	5.92984e-06	2.16571e-06	2.4601e-07	0.00739094	0.0137677	MC
K15551	2.89742e-07	4.95807e-07	0	0.00158335	0.00473079	MET
K15550	1.51735e-07	1.0443e-06	0	0.000281155	0.00249255	MET
K01826	0	4.16075e-07	0	0.0115695	0.0196484	MET
K01825	0	1.20068e-07	0	0.00492503	0.0101187	MET
K01823	3.52678e-06	1.41809e-05	2.44012e-06	0.000322309	0.00249255	MET
K13923	0	6.73632e-07	0	0.000640141	0.00280437	MET
K13479	8.60014e-06	1.59864e-05	3.27708e-06	0.00373503	0.00822336	MET
K01792	1.01819e-06	5.93711e-07	4.50574e-08	0.0153163	0.0250357	MC
K04079	0.000207382	0.00024635	0.00022474	0.000485661	0.00254836	MET
K04076	0	0	6.41772e-07	0.000257665	0.00249255	NC
K04077	0.000334796	0.000318916	0.000303005	0.00645758	0.0123848	MC
K04074	2.12537e-05	2.36391e-05	9.78621e-06	0.00997673	0.0173848	MET
K04075	0.00027748	0.000245531	0.000212152	0.00231117	0.00600288	MC
K04072	1.99279e-05	4.93646e-05	2.66219e-05	0.00239949	0.0061807	MET
K04073	6.53769e-06	5.92833e-06	3.95032e-08	0.000445618	0.00249255	MC
K00998	3.04185e-07	9.54932e-07	0	0.000411053	0.00249255	MET
K04691	3.32575e-07	1.93258e-06	0	0.000517078	0.00261594	MET
K00990	3.59122e-06	2.45063e-06	6.95477e-07	0.00535353	0.0107531	MC
K18231	7.90163e-06	8.82507e-06	2.16292e-06	0.013004	0.0217509	MET
K18234	0.000177329	0.000174262	0.000270219	0.00203451	0.00554327	NC
K03098	1.08247e-05	2.48693e-05	1.59651e-06	0.000288014	0.00249255	MET
K03152	0.000294936	0.000226146	0.000175987	9.68352e-05	0.00249255	MC
K13853	1.44986e-07	1.53331e-07	0	0.0237395	0.0363129	MET
K01922	4.48655e-06	2.43548e-06	5.61283e-08	0.0010921	0.00374315	MC
K00209	4.64691e-07	7.79544e-08	6.74083e-06	0.000187356	0.00249255	NC
K00208	0.000165116	0.000215427	0.000117829	0.00231117	0.00600288	MET
K01000	0.000367635	0.000320779	0.000339501	0.00333761	0.00760482	MC
K14591	2.52178e-06	2.23431e-06	0	0.00216521	0.00575641	MC
K01002	5.86876e-07	3.01104e-06	1.18616e-05	0.00131687	0.00423441	NC
K12506	5.30826e-06	1.52469e-05	1.07984e-05	0.0334568	0.0491486	MET
K01007	9.85628e-06	3.00221e-05	1.70282e-05	0.00701293	0.0131952	MET
K01008	1.35496e-05	3.31429e-05	9.81703e-06	0.0068569	0.0129748	MET
K13993	2.59916e-05	8.744e-05	2.84272e-05	0.0034221	0.00775411	MET
K13483	0	5.83944e-07	0	0.024916	0.0378276	MET
K10796	3.08391e-06	3.75715e-06	5.5593e-07	0.00626673	0.0121133	MET
K13480	2.37116e-07	8.33595e-07	0	0.0210728	0.0328362	MET
K14440	2.6655e-05	1.42509e-06	7.08916e-05	0.000104377	0.00249255	NC
K14445	5.6768e-05	4.99804e-05	2.09832e-05	0.00384878	0.00843444	MC
K08194	3.31714e-07	1.13456e-06	0	0.000540978	0.00266327	MET
K00336	3.85618e-05	5.90044e-05	3.24232e-05	0.0120644	0.0203542	MET
K18120	9.20852e-06	1.94842e-05	2.79101e-06	0.00112497	0.00380719	MET
K13643	5.00938e-06	2.92949e-06	5.64468e-07	0.00421123	0.00900891	MC
K08717	9.08259e-05	5.78598e-05	0.000106022	0.0108618	0.018642	NC
K01130	2.57517e-05	8.87739e-05	4.24586e-05	0.00206526	0.00559116	MET
K14682	5.80358e-06	3.15274e-06	4.23772e-07	0.00294543	0.00702152	MC
K01133	6.0693e-07	3.38954e-06	0	0.000267115	0.00249255	MET
K06113	5.40093e-05	8.20379e-05	0.000210657	0.000460821	0.00249255	NC
K08354	2.14602e-07	9.06967e-07	0	0.00230324	0.00599896	MET
K01138	1.85562e-06	3.86911e-06	1.24493e-07	0.00021775	0.00249255	MET
K01139	2.84221e-07	1.10473e-06	0	0.000540978	0.00266327	MET
K08351	2.56039e-07	1.52491e-06	0	0.000222711	0.00249255	MET
K08350	0	8.0653e-07	0	0.00510547	0.010398	MET
K02445	2.67742e-05	2.2864e-05	4.90224e-05	0.021764	0.0337667	NC
K02112	0.000289332	0.000235637	0.000231153	0.000865243	0.00327978	MC
K02111	0.000308601	0.000253641	0.000261224	0.00224848	0.00589712	MC
K02446	2.07671e-06	2.21132e-05	4.69674e-06	0.00129726	0.00421425	MET
K02117	0.000139027	0.000176461	9.27278e-05	0.000568505	0.00267644	MET
K02440	5.29906e-05	3.02615e-05	0.000104341	0.000511839	0.00261594	NC
K02115	0.000298528	0.000246044	0.000257368	0.0132667	0.0220012	MC
K01034	7.4459e-06	3.04159e-05	3.16877e-06	5.64305e-05	0.00249255	MET
K03462	1.52675e-06	7.4416e-06	2.59863e-05	0.00539383	0.0108201	NC
K02118	0.000133808	0.000123758	7.43932e-05	0.00171216	0.0049695	MC
K09023	2.72637e-07	7.34768e-07	0	0.00022528	0.00249255	MET
K01649	0.000235854	0.000248082	0.000180031	0.000359786	0.00249255	MET
K20444	2.32729e-05	3.64118e-05	5.76127e-05	0.023459	0.0359192	NC
K01640	2.149e-06	3.29782e-06	2.81432e-07	0.00602268	0.0117845	MET
K01646	1.24399e-05	1.75375e-05	6.99921e-06	0.00147367	0.00454033	MET
K01647	0.000148288	0.000205941	7.13692e-05	0.000382034	0.00249255	MET
K01644	2.37047e-05	3.67975e-05	1.60307e-05	0.00784797	0.0143332	MET
K02626	1.94975e-05	1.41127e-05	2.16167e-07	0.000393669	0.00249255	MC
K06006	3.50393e-07	2.18651e-06	0	0.00370543	0.00820486	MET
K13004	1.29573e-05	1.66742e-05	2.45754e-05	0.0147354	0.0241624	NC
K13001	1.66388e-06	1.33141e-07	7.18054e-06	0.000139952	0.00249255	NC
K06952	0	0	2.65627e-07	0.0136884	0.0226283	NC
K02024	4.01505e-07	1.4969e-06	0	0.00150055	0.00455629	MET
K03518	2.56034e-05	2.5493e-05	5.54714e-06	0.000568505	0.00267644	MC
K02022	2.67226e-05	1.35934e-05	6.40711e-07	0.000224306	0.00249255	MC
K02020	2.58828e-05	2.70757e-05	1.30585e-05	0.00298995	0.00711674	MET
K02843	2.86816e-05	1.04364e-05	1.30043e-05	0.0283678	0.0424336	MC
K03517	0.000325651	0.000316282	0.000272992	0.0236948	0.0362564	MC
K02028	0.000169194	0.000229975	0.000121571	0.00578492	0.0114424	MET
K18907	0	1.91104e-07	0	0.0185548	0.029433	MET
K01039	1.54562e-05	1.17595e-05	2.37288e-06	0.000457378	0.00249255	MC
K09021	0	1.0713e-06	0	0.000285384	0.00249255	MET
K11932	2.80988e-07	1.20459e-06	0	0.000964182	0.00350591	MET
K09758	9.03157e-05	9.37346e-05	7.02813e-05	0.02645	0.0398842	MET
K02204	2.67728e-06	1.81392e-06	3.68015e-07	0.00636144	0.0122356	MC
K02203	1.70421e-05	1.29358e-05	3.88241e-05	0.00327152	0.00752982	NC
K07130	0	0	2.03204e-06	1.839e-05	0.00249255	NC
K02200	4.17918e-06	1.751e-06	5.35697e-07	0.00287271	0.00687272	MC
K06408	2.95541e-05	3.43166e-05	6.44334e-05	0.021333	0.0331531	NC
K12999	2.38162e-06	1.94411e-06	3.65911e-08	0.000395021	0.00249255	MC
K11938	2.85485e-07	7.11373e-07	0	0.00116476	0.00388764	MET
K12992	2.98136e-05	1.88718e-05	5.16937e-05	0.00717251	0.0134036	NC
K12995	6.47269e-07	0	4.95446e-05	2.76594e-05	0.00249255	NC
K19416	0	8.28643e-07	3.22266e-06	0.00464897	0.00967931	NC
K03089	6.49835e-06	3.48665e-05	4.21524e-06	0.000422213	0.00249255	MET
K03087	3.7813e-07	1.6013e-06	0	0.00135466	0.00429772	MET
K16693	2.15491e-07	1.28743e-06	0	0.000148961	0.00249255	MET
K16692	8.31695e-08	5.3905e-07	0	0.0211084	0.0328451	MET
K16695	1.64496e-07	6.55138e-07	0	0.00150055	0.00455629	MET
K12511	1.23838e-06	8.27919e-07	7.65348e-06	0.00116796	0.00388764	NC
K12290	0	1.19455e-06	0	0.00813569	0.0147148	MET
K03346	1.96016e-06	1.52952e-06	0	0.000237637	0.00249255	MC
K09159	3.4353e-07	1.02915e-06	0	0.00458629	0.00958727	MET
K02835	0.000299987	0.00030146	0.000259801	0.0259262	0.039183	MET
K05810	0.000149705	0.000160774	0.000109929	0.00247256	0.00625169	MET
K00919	0.000303	0.000195704	0.000183227	0.00103848	0.00365389	MC
K03644	0.00010695	0.000166269	8.62729e-05	0.00131687	0.00423441	MET
K03645	3.7519e-07	1.10161e-06	0	0.00216944	0.00575641	MET
K03646	1.02285e-06	1.11279e-06	0	0.000506509	0.00261594	MET
K03640	2.99794e-05	4.98608e-05	1.07501e-05	0.00054349	0.00266327	MET
K03641	8.0125e-06	2.70375e-05	5.29357e-06	0.000767402	0.00309054	MET
K03642	1.79104e-05	6.78998e-05	1.68959e-05	0.00206526	0.00559116	MET
K03643	8.06036e-08	7.60922e-07	0	0.00682987	0.0129341	MET
K03648	0.000334769	0.000321987	0.000264751	0.0027463	0.00670425	MC
K03649	3.07896e-07	7.40535e-07	0	0.00177297	0.00510467	MET
K20511	5.64208e-08	0	0	0.01054	0.0182182	MC
K15827	5.13856e-08	7.0773e-07	0	0.000387033	0.00249255	MET
K18828	2.11132e-06	1.86489e-05	2.62137e-05	0.0018875	0.00526876	NC
K10001	7.24153e-08	9.31717e-07	0	0.000387033	0.00249255	MET
K07180	1.1064e-07	5.5675e-07	0	0.000326212	0.00249255	MET
K13918	2.60272e-06	4.58296e-06	0	0.000337322	0.00249255	MET
K07184	2.22071e-07	1.27444e-06	0	0.00509792	0.010398	MET
K06214	2.3624e-07	8.20489e-07	0	0.00135466	0.00429772	MET
K09935	7.82368e-06	1.00394e-05	3.52081e-05	0.000670491	0.00286976	NC
K07349	3.32995e-07	1.19754e-06	0	0.00748669	0.0138762	MET
K06212	1.40585e-07	7.07765e-07	0	0.00458629	0.00958727	MET
K07345	1.26528e-06	4.79062e-06	0	0.000282008	0.00249255	MET
K07347	1.85903e-06	7.68859e-06	1.64648e-08	0.000273099	0.00249255	MET
K07346	4.67901e-07	2.44154e-06	0	0.000411053	0.00249255	MET
K07341	4.65113e-05	5.70264e-05	3.11572e-05	0.00547534	0.0109601	MET
K19119	4.52803e-05	2.01166e-05	6.673e-05	0.000585819	0.00267644	NC
K16509	3.81411e-06	6.46116e-06	1.31252e-06	0.00813083	0.0147148	MET
K11646	1.24591e-06	1.54512e-05	4.95905e-06	0.0211207	0.0328451	MET
K11645	6.15958e-05	0.000117787	1.20349e-05	0.00013776	0.00249255	MET
K05818	8.40652e-08	6.32767e-07	0	0.0024218	0.00620937	MET
K02444	1.26158e-06	5.00297e-06	0	0.000667881	0.00286976	MET
K06968	1.33904e-06	1.93406e-05	3.62487e-06	0.00131687	0.00423441	MET
K04078	0.000157014	0.000188802	0.000137805	0.00239949	0.0061807	MET
K16235	0	0	1.68002e-06	0.00817667	0.0147661	NC
K06966	0.000400348	0.000357743	0.000186682	0.000911882	0.00340679	MC
K13301	3.83019e-07	1.35393e-06	0	0.00022528	0.00249255	MET
K00748	0.000236829	0.000241749	0.000183332	0.00911804	0.0162276	MET
K02680	3.21707e-07	1.39965e-06	0	0.00135466	0.00429772	MET
K07507	0.000206475	0.000156752	0.000251788	0.010358	0.0180001	NC
K08994	9.66422e-08	3.66141e-07	0	0.00811179	0.0147115	MET
K07504	1.35724e-07	1.1738e-06	3.65369e-05	0.000171949	0.00249255	NC
K07502	2.0071e-05	1.15599e-05	3.51017e-05	0.0162445	0.0262135	NC
K07501	0	0	2.69968e-06	7.10837e-05	0.00249255	NC
K08992	1.5995e-07	1.2e-06	0	0.00771256	0.014119	MET
K03219	7.35451e-07	8.12861e-08	4.03995e-08	0.00775378	0.0141889	MC
K13018	8.9562e-05	5.68398e-05	4.32869e-05	0.00266514	0.00659575	MC
K10227	0	0	1.12056e-07	0.0290912	0.0434045	NC
K09802	0	4.77724e-07	0	0.0185548	0.029433	MET
K09803	6.20288e-06	2.72243e-05	2.09632e-05	0.0110813	0.018935	MET
K09804	0	0	2.1234e-06	6.70702e-05	0.00249255	NC
K16346	1.77737e-07	8.06634e-07	0	0.0015904	0.00474273	MET
K16345	1.80595e-05	2.7569e-05	2.33782e-07	0.000263225	0.00249255	MET
K09807	2.0407e-05	3.1436e-05	4.3652e-05	0.00287271	0.00687272	NC
K09808	0.000351572	0.000345008	0.000186805	0.00115923	0.00388764	MC
K10914	4.21903e-07	2.77451e-06	1.01679e-06	0.0162154	0.0262135	MET
K10773	0.000360295	0.000352933	0.00031618	0.00841702	0.0151591	MC
K10778	1.7614e-07	1.42112e-06	0	0.00370543	0.00820486	MET
K14348	3.67939e-07	1.77976e-06	0	0.000163123	0.00249255	MET
K11358	4.51289e-05	3.05798e-05	6.31996e-05	0.0224268	0.0345539	NC
K01903	1.1291e-05	3.55354e-05	2.35852e-07	0.000109021	0.00249255	MET
K01902	1.08384e-05	3.81432e-05	1.03472e-06	6.50731e-05	0.00249255	MET
K01908	6.83022e-08	6.23653e-07	0	0.00304322	0.00720178	MET
K13819	1.19509e-06	1.50078e-05	5.19299e-06	0.0184535	0.0293622	MET
K00411	0	0	1.78761e-06	0.000118407	0.00249255	NC
K09928	1.0327e-06	1.06991e-05	1.3548e-07	0.00807156	0.0146899	MET
K19745	4.16182e-07	1.47137e-06	0	0.000222711	0.00249255	MET
K18698	8.96678e-07	4.89815e-06	5.59628e-08	0.00401995	0.00876024	MET
K05927	0	0	3.99342e-06	7.10837e-05	0.00249255	NC
K18692	4.48407e-06	8.21373e-06	2.2827e-06	0.00489275	0.010079	MET
K18691	0.000214643	0.000135607	0.000189484	0.0132667	0.0220012	MC
K17247	4.81425e-07	5.87961e-07	0	0.00670541	0.0127865	MET
K07160	6.5065e-06	4.96121e-06	1.95052e-06	0.00750264	0.0138762	MC
K00342	0.000219177	0.000186548	0.000182796	0.0188734	0.0298776	MC
K00343	0.000228631	0.000169367	0.000180269	0.00757805	0.0139659	MC
K00344	2.89704e-07	1.11835e-06	0	0.000411053	0.00249255	MET
K00697	1.36632e-07	4.47946e-07	0	0.000376787	0.00249255	MET
K00346	0.000203744	0.000144212	0.000155923	0.0167392	0.0269374	MC
K00347	0.000224921	0.000166053	0.000180811	0.00603608	0.0117845	MC
K09116	5.43011e-07	1.64106e-06	2.65007e-06	0.00254786	0.00640394	NC
K09117	0.000341692	0.000284509	0.000285932	0.0167392	0.0269374	MC
K02457	8.15748e-07	3.22e-06	0	0.000517078	0.00261594	MET
K02106	1.69241e-06	9.88728e-06	1.3692e-06	0.000631445	0.00277931	MET
K05823	3.06349e-06	3.70895e-06	7.39878e-07	0.00178203	0.00512129	MET
K05820	5.89043e-07	2.35292e-06	0	0.000222711	0.00249255	MET
K02107	3.91719e-07	7.23824e-07	0	0.00525681	0.0105862	MET
K14056	0	2.18579e-07	0	0.024916	0.0378276	MET
K02452	5.36735e-07	2.27389e-06	0	0.000242332	0.00249255	MET
K03458	2.93993e-06	7.55363e-06	8.67858e-07	0.000388779	0.00249255	MET
K18348	1.39537e-05	1.81036e-05	4.08032e-05	0.00161245	0.00479322	NC
K00526	1.12399e-05	3.09379e-05	3.32286e-06	0.000101292	0.00249255	MET
K00527	0.000335023	0.000311535	0.000370461	0.00217658	0.0057688	NC
K15524	2.62568e-06	7.60353e-06	0	0.000192591	0.00249255	MET
K01835	0.000312934	0.000253947	0.00030683	0.00752142	0.0138944	MC
K18345	9.82485e-06	1.23394e-05	2.89909e-05	0.00327152	0.00752982	NC
K00529	6.03135e-08	5.12182e-07	0	0.0117835	0.0199524	MET
K04069	0.000360476	0.000394366	0.000322295	0.0326308	0.048056	MET
K04068	0.000225934	0.000214647	0.000125492	0.000377289	0.00249255	MC
K04065	0	1.2112e-06	0	0.00744637	0.0138544	MET
K04067	4.05469e-07	1.51486e-06	0	0.00165299	0.00486419	MET
K04063	1.54766e-07	5.76477e-07	0	0.00035938	0.00249255	MET
K07043	0.000199736	0.000231112	9.64154e-05	0.000283018	0.00249255	MET
K09923	2.05055e-07	1.74336e-06	0	0.00771256	0.014119	MET
K21064	3.56595e-06	4.96801e-06	2.76045e-06	0.0158039	0.0256799	MET
K05809	9.11784e-08	1.13765e-06	0	0.0027846	0.00671381	MET
K02108	0.000276509	0.00025997	0.000232645	0.00124328	0.00406877	MC
K09934	2.2747e-07	7.7168e-07	0	0.00444505	0.00939719	MET
K19336	0	2.90384e-07	0	0.0311224	0.0460963	MET
K10004	5.22322e-06	3.71442e-06	1.02014e-06	0.00515649	0.0104156	MC
K19334	2.17466e-07	1.70076e-06	0	0.00216944	0.00575641	MET
K19333	2.95999e-07	9.23346e-07	0	0.00124253	0.00406877	MET
K03981	7.70799e-06	4.66494e-06	1.1968e-06	0.00319075	0.00740964	MC
K10000	2.63476e-07	9.33621e-07	0	0.000481535	0.00254836	MET
K09927	1.49957e-06	1.06778e-06	1.33597e-05	0.0010701	0.0037329	NC
K09024	6.44195e-08	8.33158e-07	0	0.0024218	0.00620937	MET
K02459	3.15326e-07	1.94463e-06	0	0.000540978	0.00266327	MET
K09022	0.000228392	0.000227696	0.000100494	0.000451697	0.00249255	MC
K00795	7.36425e-06	2.03174e-05	4.30704e-06	0.000288014	0.00249255	MET
K19338	2.56819e-07	2.60822e-06	5.10722e-07	0.0280856	0.0420248	MET
K07238	0.000178893	0.000189805	0.000239969	0.0057417	0.0113618	NC
K08218	0.000271519	0.000235776	0.000140891	0.000249139	0.00249255	MC
K08219	1.14696e-06	2.58354e-06	7.5113e-08	0.00918669	0.0162877	MET
K02904	4.20933e-05	5.87307e-05	3.92765e-05	0.00636144	0.0122356	MET
K08217	2.95478e-05	0.000116838	3.77394e-05	0.0016004	0.00476043	MET
K02906	0.000230895	0.000234845	0.000303921	0.000865243	0.00327978	NC
K02907	1.2997e-05	2.48505e-05	1.39422e-05	0.00116796	0.00388764	MET
K07722	1.77945e-05	1.75933e-05	2.04009e-06	0.000433985	0.00249255	MC
K00230	5.51231e-06	4.74046e-06	8.40801e-07	0.00739094	0.0137677	MC
K00231	1.37457e-06	2.02182e-05	3.37765e-06	0.000184567	0.00249255	MET
K00239	0.000299043	0.000236268	0.000218076	0.0045053	0.00947311	MC
K15855	2.03237e-05	7.69926e-06	1.64046e-06	0.00515649	0.0104156	MC
K14588	1.51846e-07	1.26108e-06	0	0.0010879	0.0037329	MET
K17246	1.92485e-07	5.32681e-07	0	0.00599885	0.0117692	MET
K20459	4.57252e-05	2.55638e-05	6.88202e-05	0.00871683	0.0155908	NC
K01012	0.000212814	0.00028884	0.000244877	0.00331267	0.00757971	MET
K01011	5.2202e-06	2.1807e-06	0	0.000545983	0.00267268	MC
K00835	1.25058e-06	3.43606e-06	1.77872e-07	0.00067723	0.00288564	MET
K00832	6.63564e-06	5.25798e-06	7.56487e-07	0.00116796	0.00388764	MC
K00833	0.000189977	0.000124608	0.000238354	0.00370712	0.00820486	NC
K00831	0.000241862	0.000223307	0.000277147	0.00555809	0.0110972	NC
K04080	0	2.4232e-06	0	0.00268421	0.00661735	MET
K18919	0	7.53328e-07	0	0.00313383	0.00731384	MET
K20454	0	0	4.85637e-07	0.000572748	0.00267644	NC
K18118	8.00758e-05	4.61274e-05	1.47101e-05	0.000605171	0.00271745	MC
K18119	8.03549e-06	3.63779e-06	6.33302e-07	0.00232857	0.00603465	MC
K02825	9.61106e-06	2.41166e-05	3.28163e-06	0.000430743	0.00249255	MET
K01633	7.57706e-05	0.000126616	3.13003e-05	0.000183646	0.00249255	MET
K12136	7.39027e-08	1.05136e-06	0	0.00619648	0.0120623	MET
K13677	1.18594e-05	1.29082e-05	1.3007e-06	0.000408712	0.00249255	MET
K04335	7.51109e-08	1.48953e-06	0	0.0172828	0.0276651	MET
K04334	2.075e-07	4.62585e-07	0	0.00571465	0.0113371	MET
K12137	3.08237e-05	3.5686e-05	5.73219e-05	0.0201914	0.0315786	NC
K08322	1.09806e-05	1.28206e-05	2.04905e-06	0.00180445	0.00512534	MET
K08323	2.95132e-06	3.90164e-06	4.068e-07	0.00279479	0.00671381	MET
K01129	0.000344785	0.000320825	0.00028038	0.00254786	0.00640394	MC
K08321	3.12591e-05	2.6951e-05	1.05396e-05	0.00628242	0.0121185	MC
K08326	1.06113e-07	1.31467e-06	0	0.0015374	0.00463504	MET
K04338	0	1.14772e-06	0	0.0169824	0.0272442	MET
K15987	0.00021647	0.00021827	0.000151489	0.00422177	0.00902733	MET
K02471	5.35373e-08	4.22605e-07	0	0.00541292	0.0108444	MET
K02472	9.83086e-05	9.42807e-05	5.13944e-05	0.00327152	0.00752982	MC
K02474	0.000135362	8.87833e-05	0.000177693	0.000246044	0.00249255	NC
K17320	6.13907e-05	8.65869e-05	0.000258224	0.000816895	0.00318439	NC
K02477	0.0001043	0.000147448	2.94823e-05	0.000263225	0.00249255	MET
K02478	7.15037e-07	3.32174e-06	0	0.000214208	0.00249255	MET
K19971	9.29484e-07	7.13323e-07	0	0.000314499	0.00249255	MC
K01659	3.18618e-07	1.44482e-06	0	0.000426826	0.00249255	MET
K13587	9.55221e-08	6.72817e-06	8.6197e-08	0.0210454	0.0328263	MET
K13584	4.57759e-08	8.35022e-06	1.14038e-07	0.0174488	0.0278775	MET
K01653	0.000298336	0.000258604	0.00021926	0.00169937	0.00496002	MC
K01654	6.09467e-05	7.89329e-06	3.497e-05	0.000169951	0.00249255	MC
K12138	3.75101e-08	5.68683e-07	0	0.0230395	0.0353929	MET
K03204	1.47431e-07	5.30577e-07	0	0.00169713	0.00496002	MET
K11736	1.24956e-07	8.29914e-07	0	0.000540978	0.00266327	MET
K02053	5.23369e-06	1.15335e-05	1.03042e-06	0.000961035	0.00350591	MET
K02054	9.72515e-06	7.93288e-06	4.03089e-07	0.000359786	0.00249255	MC
K02055	1.09383e-05	1.12017e-05	1.53461e-06	0.000932632	0.00342944	MET
K03503	5.57978e-05	8.76585e-05	9.8262e-05	0.00148848	0.00455219	NC
K03502	0.000136002	0.000136997	0.000324591	0.000433985	0.00249255	NC
K12972	1.6867e-07	1.57017e-06	7.8748e-07	0.00622717	0.0120969	MET
K05559	0	0	5.17084e-07	0.000724188	0.00300223	NC
K03893	3.80524e-08	9.57066e-07	0	0.0157344	0.0256205	MET
K16324	2.33093e-07	8.50135e-07	0	0.00448378	0.0094406	MET
K10038	3.52811e-06	6.50235e-06	9.2081e-08	0.000262283	0.00249255	MET
K09749	1.73344e-05	1.01199e-05	3.28683e-05	0.00997673	0.0173848	NC
K02279	7.93721e-07	1.81532e-06	9.07317e-06	0.00841702	0.0151591	NC
K07235	4.64289e-07	1.76822e-05	4.39228e-06	0.000307645	0.00249255	MET
K13014	1.3529e-07	6.06317e-07	0	0.000928937	0.00342665	MET
K06020	3.64497e-06	0	0	5.6944e-05	0.00249255	MC
K14055	3.73918e-08	1.00416e-06	0	0.0024218	0.00620937	MET
K02568	3.18489e-07	1.02898e-06	3.41004e-06	0.0100506	0.0175004	NC
K02422	3.06558e-05	3.18945e-05	4.94105e-05	0.0270518	0.0406343	NC
K02858	1.57555e-05	1.08808e-05	5.62938e-07	0.000422213	0.00249255	MC
K00351	0.000225308	0.000147526	0.000195047	0.023459	0.0359192	MC
K03477	3.91438e-07	1.25617e-06	0	0.000620291	0.00276145	MET
K03475	9.0166e-06	2.88795e-05	6.94109e-06	0.00194986	0.00537534	MET
K03474	0.000287177	0.0002217	0.000242349	0.0132667	0.0220012	MC
K03473	0.00024362	0.000196215	0.000132979	0.00124328	0.00406877	MC
K03472	5.32418e-07	1.21533e-06	0	0.00541292	0.0108444	MET
K03471	2.86496e-06	2.01651e-06	5.1804e-07	0.0269497	0.0405853	MC
K03470	0.000361649	0.000324851	0.000288623	0.00145536	0.00452199	MC
K03525	0.000336236	0.000276886	0.000263191	0.00464251	0.00967017	MC
K12983	1.30982e-07	4.22571e-07	0	0.00181088	0.00512534	MET
K12985	1.69975e-07	5.88282e-07	0	0.00197291	0.00540698	MET
K03478	1.11415e-05	6.93678e-06	8.62748e-07	0.00222611	0.00586678	MC
K19405	7.6601e-06	1.09534e-05	3.35494e-06	0.00997673	0.0173848	MET
K18800	2.04421e-07	8.45705e-07	0	0.00116476	0.00388764	MET
K17758	0.000302019	0.000209115	0.0001877	0.000667147	0.00286976	MC
K14052	6.1073e-08	5.26436e-07	0	0.00811179	0.0147115	MET
K03092	0.000219613	0.000198988	0.000119368	0.00148848	0.00455219	MC
K13010	1.92683e-06	4.15101e-06	1.79127e-05	0.000708401	0.00297124	NC
K02302	1.84305e-06	6.34263e-06	1.9578e-05	0.000220966	0.00249255	NC
K02300	0	5.74345e-07	0	0.024916	0.0378276	MET
K03528	2.74436e-07	9.89286e-07	0	0.00077766	0.00309054	MET
K02429	0.00050862	0.000417002	0.000262758	0.00067723	0.00288564	MC
K06118	0	1.35745e-05	3.55602e-06	0.000598898	0.00271745	MET
K17865	2.57158e-07	0	3.4103e-06	0.00366031	0.00813984	NC
K14059	1.76478e-07	1.04615e-06	0	0.00108588	0.0037329	MET
K07080	2.2937e-05	5.02819e-05	1.10751e-05	0.00102814	0.00363195	MET
K14058	4.04354e-06	2.68951e-06	4.86262e-07	0.00139132	0.00439321	MC
K03651	3.39764e-07	1.21187e-06	0	0.000222711	0.00249255	MET
K03657	0.000371372	0.00039014	0.000473968	0.000371672	0.00249255	NC
K03656	5.69922e-08	9.62991e-07	0	0.00361636	0.00808444	MET
K03655	0.000755167	0.000562264	0.000775698	0.00761603	0.0140193	NC
K03654	0.000571053	0.00043473	0.000491439	0.00447164	0.00944058	MC
K11748	3.74207e-07	1.10221e-06	0	0.00148826	0.00455219	MET
K11746	0	7.39649e-07	0	0.00157737	0.00471594	MET
K11747	3.54507e-07	8.2423e-07	0	0.000765725	0.00309054	MET
K11744	1.15806e-06	2.58528e-06	1.47173e-07	0.0146585	0.0241124	MET
K11745	1.6859e-07	1.15202e-06	0	0.000705801	0.00297124	MET
K11742	2.28153e-07	1.05359e-05	2.95097e-06	0.000135643	0.00249255	MET
K11740	4.86614e-07	1.20668e-06	0	0.001384	0.00438486	MET
K11741	4.15954e-05	5.36334e-05	0.00012537	0.000802724	0.00316348	NC
K13921	1.59613e-07	5.55178e-07	0	0.00271057	0.00664831	MET
K03773	0.000353621	0.000311822	0.000241976	0.00515649	0.0104156	MC
K13926	1.42757e-07	1.09561e-06	0	0.00583086	0.0115284	MET
K13928	0	1.68894e-06	4.98465e-07	0.000133048	0.00249255	MET
K13929	1.35081e-07	2.07655e-06	1.48119e-06	0.00357962	0.00804466	MET
K06203	5.80474e-07	4.77273e-06	4.87771e-06	0.000433985	0.00249255	NC
K06201	0.000230349	0.000205443	0.000133625	0.000283018	0.00249255	MC
K06207	0.000357347	0.000323513	0.000309365	0.0123081	0.0207504	MC
K06204	8.52856e-06	3.80152e-05	7.47518e-06	0.00148848	0.00455219	MET
K04844	4.88341e-06	4.42224e-06	3.61267e-08	0.000446739	0.00249255	MC
K00769	8.68104e-07	1.70555e-06	0	0.00292517	0.00699106	MET
K11630	0	0	2.04565e-06	1.839e-05	0.00249255	NC
K11636	4.12134e-07	1.85385e-06	0	0.00022528	0.00249255	MET
K03779	2.83634e-06	4.06326e-06	4.61347e-07	0.0109163	0.0186873	MET
K02403	4.52452e-07	1.02804e-06	0	0.00567978	0.0112871	MET
K06978	4.69016e-05	6.90624e-05	9.55722e-06	0.000283018	0.00249255	MET
K16248	2.48675e-06	3.45183e-06	8.30261e-06	0.0043831	0.00929567	NC
K06971	1.62728e-05	2.78462e-05	4.79969e-06	0.00012341	0.00249255	MET
K06970	7.45116e-07	2.13847e-05	9.525e-07	0.000561371	0.00267644	MET
K06973	0.000276792	0.000253265	0.000112611	0.000359786	0.00249255	MC
K06975	3.01271e-05	7.21287e-05	4.64491e-06	6.65538e-05	0.00249255	MET
K06976	6.19959e-07	5.70716e-06	2.82095e-06	0.00606804	0.0118419	MET
K07082	0.000225928	0.000219545	0.000174386	0.00796658	0.0145045	MC
K00758	2.92101e-07	2.36462e-05	3.27539e-07	0.000457378	0.00249255	MET
K20265	6.98146e-05	7.99059e-05	0.000160984	0.00159242	0.00474273	NC
K07085	0.000426444	0.000365206	0.000363165	0.00918669	0.0162877	MC
K06950	0.000501976	0.000378009	0.000351847	0.00564209	0.0112265	MC
K07088	0.000110733	6.98149e-05	0.000217101	0.000153394	0.00249255	NC
K07089	0.000236838	0.000188779	0.000275202	0.00013673	0.00249255	NC
K00757	0.000330936	0.000262261	0.000246052	0.00411754	0.00886124	MC
K00756	2.04494e-05	1.08846e-05	3.83695e-05	0.0225956	0.0348026	NC
K10906	5.0509e-07	2.47485e-06	0	0.000183749	0.00249255	MET
K07571	5.93666e-06	1.13672e-05	4.09909e-06	0.00920968	0.0163223	MET
K03811	0.000128954	0.000140447	8.13662e-05	0.00373503	0.00822336	MET
K06378	1.31943e-05	1.41675e-05	2.92826e-06	0.00116796	0.00388764	MET
K09817	0.000182962	0.000176353	0.000136278	0.00146266	0.00452358	MC
K09816	0.000305104	0.000257118	0.000255027	0.0047839	0.00989845	MC
K09815	0.000101045	0.000136924	6.97929e-05	0.000451697	0.00249255	MET
K11180	1.77704e-06	1.61591e-05	5.23046e-06	0.023459	0.0359192	MET
K11181	1.60085e-06	1.76658e-05	5.61658e-06	0.0171201	0.0274369	MET
K09811	0.000250551	0.000189014	0.000241906	0.00333761	0.00760482	MC
K09810	0.000292486	0.000279857	0.00021276	0.00311976	0.00731119	MC
K07470	0	2.31381e-07	0	0.00712397	0.0133236	MET
K10763	2.08974e-07	5.6431e-07	0	0.00124253	0.00406877	MET
K10762	3.29467e-07	1.06497e-06	0	0.00181088	0.00512534	MET
K04765	1.18499e-06	2.09428e-05	5.5068e-06	0.000884932	0.00333815	MET
K01938	0.000205874	0.000212357	9.6428e-05	0.000457378	0.00249255	MET
K06956	6.94954e-06	9.74507e-06	1.08404e-06	0.000460821	0.00249255	MET
K01934	0.000111565	0.00013384	9.71724e-05	0.0132667	0.0220012	MET
K01933	0.000337476	0.000313257	0.000307417	0.00411754	0.00886124	MC
K00354	1.40879e-07	8.05361e-08	1.62345e-06	0.00503923	0.0103261	NC
K01169	2.65288e-07	1.37741e-06	0	0.00100711	0.00357929	MET
K07798	1.9191e-05	3.06686e-05	2.62155e-07	0.000322309	0.00249255	MET
K07796	2.51557e-07	9.6558e-07	0	0.00022528	0.00249255	MET
K20862	2.86024e-05	8.38288e-06	3.00778e-06	0.00162459	0.00481398	MC
K20861	1.75171e-07	1.34587e-06	0	0.00975077	0.0170867	MET
K00963	1.45186e-05	5.96894e-05	2.82709e-05	0.00331267	0.00757971	MET
K07792	2.57446e-05	2.40348e-05	9.6118e-06	0.000461975	0.00249255	MC
K07793	0.000104086	0.000151278	3.68987e-05	0.00124328	0.00406877	MET
K07150	1.4217e-05	4.67495e-05	1.84363e-05	0.0158039	0.0256799	MET
K00688	0.000313157	0.000271267	0.000306033	0.0086517	0.0155222	MC
K07153	6.1313e-08	1.28177e-06	0	0.00682987	0.0129341	MET
K07154	0.000281938	0.000203583	0.00036405	0.00373503	0.00822336	NC
K09952	0.000118408	0.000107677	6.28344e-05	0.00706572	0.013241	MC
K07404	2.93847e-05	2.04863e-05	4.77191e-05	0.0187324	0.0296745	NC
K07405	3.54078e-05	7.81995e-05	2.06942e-05	0.00016617	0.00249255	MET
K07402	3.17902e-05	3.4071e-05	1.34429e-05	0.000582897	0.00267644	MET
K07403	8.71614e-05	5.23772e-05	7.22393e-05	0.0323869	0.0478176	MC
K00687	2.28042e-06	2.15847e-06	0	0.000394395	0.00249255	MC
K20885	1.71265e-07	8.0628e-08	4.20944e-05	0.00040382	0.00249255	NC
K12962	5.58052e-06	1.62648e-06	8.93173e-06	0.00628242	0.0121185	NC
K20881	3.9389e-07	1.59415e-06	0	0.00181088	0.00512534	MET
K20882	9.25281e-07	2.55453e-06	8.88605e-08	0.00331267	0.00757971	MET
K00968	1.64786e-05	2.57032e-05	3.57308e-06	0.000433985	0.00249255	MET
K05835	5.32774e-06	3.10826e-06	7.58221e-07	0.0015531	0.00466048	MC
K05834	6.08525e-07	1.63597e-06	0	0.00077766	0.00309054	MET
K05837	0.000212449	0.000234484	0.000128207	0.000302781	0.00249255	MET
K05838	7.98194e-08	1.16279e-06	0	0.00707414	0.013241	MET
K00533	6.8143e-06	6.05706e-06	7.62654e-07	0.00114483	0.00385462	MC
K15532	3.7777e-05	7.84121e-05	9.59161e-05	0.00939573	0.016539	NC
K15534	0	2.19416e-06	1.48515e-06	0.00251685	0.00634306	MET
K15539	5.08121e-07	1.29774e-06	0	0.00700197	0.0131952	MET
K06373	7.23371e-05	4.34913e-05	0.000114587	0.0147354	0.0241624	NC
K01802	8.28674e-05	6.7507e-05	1.65733e-05	0.000527427	0.00263596	MC
K01803	0.000281897	0.000332457	0.00026646	0.00219297	0.00580564	MET
K01804	6.22594e-05	7.23426e-05	0.000123631	0.00279479	0.00671381	NC
K01805	5.62476e-05	7.60552e-05	0.000125678	0.000430743	0.00249255	NC
K04058	6.66094e-07	1.10977e-07	0	0.000360945	0.00249255	MC
K11710	0	0	9.20335e-07	0.000110201	0.00249255	NC
K00809	2.07293e-05	5.65558e-06	7.85063e-06	0.0324196	0.0478507	MC
K01246	0.000146761	0.000172935	0.000102973	0.0142286	0.0234714	MET
K01247	4.64633e-06	4.75514e-06	2.4972e-05	0.000359786	0.00249255	NC
K01243	0.000140092	0.000159964	9.58481e-05	0.00232857	0.00603465	MET
K01241	3.32851e-05	4.13854e-05	8.3216e-06	0.000322309	0.00249255	MET
K10014	3.39981e-07	8.02036e-07	0	0.00428004	0.00913448	MET
K14267	4.12436e-06	1.59474e-06	4.45284e-07	0.00305035	0.00720178	MC
K10013	2.7847e-07	6.85084e-07	0	0.000964182	0.00350591	MET
K10012	2.5135e-05	1.76685e-05	4.95914e-05	0.00421123	0.00900891	NC
K12113	2.61443e-07	8.98855e-07	0	0.00748669	0.0138762	MET
K18214	7.86315e-06	3.21937e-06	2.22134e-05	0.000431821	0.00249255	NC
K13829	0	5.93594e-06	0	0.0131939	0.0220012	MET
K19180	5.2986e-07	3.56811e-06	2.9787e-06	0.0158039	0.0256799	MET
K02911	1.64454e-05	2.24036e-05	1.21803e-05	0.00133677	0.00427583	MET
K02914	2.18294e-05	1.58683e-05	1.11192e-05	0.00428558	0.00913448	MC
K18014	6.39046e-06	8.90691e-06	5.54859e-07	0.000205513	0.00249255	MET
K00228	1.31187e-07	6.84718e-07	0	0.00112504	0.00380719	MET
K00226	8.02574e-05	0.000120071	3.31622e-05	0.000205513	0.00249255	MET
K01338	0.000290733	0.000311821	0.000246541	0.000431821	0.00249255	MET
K02682	3.37282e-07	1.84391e-06	0	0.0034674	0.00783016	MET
K02681	1.99882e-07	9.51477e-07	0	0.00361636	0.00808444	MET
K01069	2.34969e-07	1.95785e-06	0	0.00024074	0.00249255	MET
K02687	0.000294437	0.000294518	0.000230699	0.00405624	0.00880204	MET
K02686	1.55834e-07	1.66947e-06	0	0.00865521	0.0155222	MET
K01791	0.000359323	0.000302426	0.000234324	0.000220966	0.00249255	MC
K02688	6.31193e-06	4.1882e-06	9.60905e-07	0.00287271	0.00687272	MC
K01066	4.08357e-06	1.50679e-05	1.09139e-05	0.00448283	0.0094406	MET
K00824	2.04066e-05	1.53354e-05	4.06997e-06	0.00115923	0.00388764	MC
K00821	0.000275456	0.000211623	0.000222781	0.030273	0.0450525	MC
K00820	0.00011537	0.000195778	0.00023617	0.00016617	0.00249255	NC
K01488	1.79812e-05	8.33405e-05	1.02311e-05	0.00240549	0.00618593	MET
K01484	2.53897e-07	1.00162e-06	0	0.00121621	0.00401107	MET
K01485	5.73361e-06	8.82367e-06	8.07511e-07	0.000283018	0.00249255	MET
K01486	4.52485e-05	4.93317e-05	2.4011e-05	0.0027463	0.00670425	MET
K01487	7.48367e-05	3.83754e-05	6.31994e-05	0.0197916	0.0310887	MC
K01480	2.07332e-05	6.64615e-05	6.26436e-05	0.000377289	0.00249255	MET
K01482	2.20388e-06	1.06952e-06	1.23728e-07	0.013299	0.022047	MC
K01939	0.000300412	0.000229896	0.000250485	0.0161231	0.0260898	MC
K01664	2.59795e-06	4.14663e-06	0	0.000336398	0.00249255	MET
K01665	6.68776e-05	9.88023e-05	2.06938e-05	0.000243596	0.00249255	MET
K01666	3.31394e-05	6.08396e-05	7.13994e-05	0.0197916	0.0310887	NC
K01662	0.000478649	0.00036231	0.000328978	0.000220966	0.00249255	MC
K02468	2.78176e-07	1.07551e-06	0	0.00181088	0.00512534	MET
K02467	2.17624e-07	1.44104e-06	0	0.000652947	0.00283916	MET
K05306	2.31742e-05	6.76825e-05	2.88197e-07	0.000109455	0.00249255	MET
K05305	1.83722e-07	5.36645e-07	6.49381e-06	0.00105223	0.00367808	NC
K02464	2.52735e-07	1.03733e-06	0	0.00811179	0.0147115	MET
K01668	2.4338e-06	2.53167e-06	0	0.000409238	0.00249255	MET
K01669	2.90353e-07	1.13704e-06	0	0.000769833	0.00309054	MET
K02460	1.7197e-07	1.31658e-06	0	0.00201493	0.00551243	MET
K01466	3.09349e-06	5.52636e-06	8.18705e-07	0.000568505	0.00267644	MET
K01467	2.40741e-06	3.19332e-06	0	0.000347793	0.00249255	MET
K01464	1.09117e-05	1.81812e-05	8.09101e-06	0.0158039	0.0256799	MET
K01462	0.000238174	0.000281409	0.000241652	0.0086517	0.0155222	MET
K01460	5.36942e-07	2.11026e-06	0	0.000202541	0.00249255	MET
K13599	1.05658e-06	1.55205e-05	3.70671e-06	0.00750264	0.0138762	MET
K08968	1.25996e-05	3.13812e-05	9.35294e-06	0.00258637	0.00647285	MET
K01468	0.000148843	0.000173886	0.000112763	0.0113334	0.0193094	MET
K08969	0	7.09437e-07	0	0.0310492	0.0460901	MET
K02860	0.000140497	0.000149921	7.7976e-05	0.000527427	0.00263596	MET
K09251	2.23718e-07	8.55753e-07	0	0.00300399	0.00712475	MET
K02864	0.000236253	0.000293869	0.000323457	0.00180445	0.00512534	NC
K13069	4.37886e-07	1.51699e-06	0	0.00100711	0.00357929	MET
K11203	3.66992e-06	1.05018e-05	0	0.000247351	0.00249255	MET
K02041	5.71131e-06	1.20811e-05	3.79476e-07	0.000433985	0.00249255	MET
K02043	4.7461e-07	1.75432e-06	0	0.00035938	0.00249255	MET
K02042	9.13949e-06	2.64886e-05	1.1412e-06	0.000153394	0.00249255	MET
K02045	2.97355e-06	3.47513e-06	1.98534e-05	0.00224848	0.00589712	NC
K02044	4.05253e-06	1.15382e-05	7.7004e-07	0.000183646	0.00249255	MET
K02047	2.95068e-06	3.26243e-06	1.38225e-05	0.00261236	0.00648922	NC
K19545	1.40899e-05	0.000105853	4.65395e-05	0.000431821	0.00249255	MET
K02048	3.90222e-06	6.49152e-06	1.81775e-05	0.00305035	0.00720178	NC
K18968	1.59051e-07	7.21675e-07	0	0.00191958	0.00531743	MET
K12111	4.56861e-06	5.5595e-06	2.53043e-08	0.000455835	0.00249255	MET
K03319	3.78025e-06	3.517e-06	9.92381e-07	0.00900478	0.0160383	MC
K03316	4.58773e-06	7.54525e-06	1.55446e-06	0.00515649	0.0104156	MET
K03314	2.36113e-07	4.55706e-06	3.63741e-07	0.00141943	0.00445779	MET
K03315	0.000205986	0.000138236	0.000154877	0.00448283	0.0094406	MC
K03312	3.79351e-05	6.94929e-05	1.2631e-05	0.000249139	0.00249255	MET
K03313	0.000130189	8.94196e-05	0.000159908	0.00603608	0.0117845	NC
K03310	0.000326779	0.000344778	0.00024176	0.0201914	0.0315786	MET
K03311	9.74195e-06	3.76492e-05	1.22966e-05	0.00112497	0.00380719	MET
K12500	0	8.87413e-07	0	0.00510547	0.010398	MET
K03275	3.61932e-07	1.19979e-06	0	0.000374621	0.00249255	MET
K03796	2.7342e-07	1.30818e-06	0	0.000444403	0.00249255	MET
K03799	3.03717e-05	0.000104695	2.04422e-05	0.000341385	0.00249255	MET
K13281	9.54976e-07	3.17232e-06	0	0.000237637	0.00249255	MET
K13283	6.07224e-07	1.75948e-06	0	0.00108599	0.0037329	MET
K03402	0.000133762	0.000164724	9.87243e-05	0.00133677	0.00427583	MET
K12289	0	7.51326e-07	0	0.00600287	0.0117692	MET
K03407	5.83594e-05	5.81859e-05	0.000105966	0.0298969	0.0445496	NC
K03404	2.31415e-06	9.61599e-07	0	0.00304741	0.00720178	MC
K18829	0	7.46051e-06	1.50669e-06	0.0107582	0.0184912	MET
K03408	5.64093e-05	6.9269e-05	0.000104904	0.0162852	0.026261	NC
K03409	8.3378e-07	0	1.86492e-07	0.00654336	0.0125359	MC
K18928	5.24108e-05	9.52638e-05	3.4764e-05	0.00199422	0.00545899	MET
K12532	0	5.72944e-06	1.20351e-07	0.000157149	0.00249255	MET
K19431	0	0	3.50743e-06	1.839e-05	0.00249255	NC
K06162	3.06184e-06	8.62349e-06	0	0.000247351	0.00249255	MET
K03228	1.41155e-06	1.35978e-06	9.09695e-08	0.0111468	0.0190401	MC
K02316	0.000322809	0.000251191	0.000301008	0.0165313	0.0266303	MC
K06166	7.12928e-07	2.59021e-06	0	6.82149e-05	0.00249255	MET
K02313	0.000262112	0.000279171	0.00019627	0.000670491	0.00286976	MET
K06165	4.55731e-07	3.53422e-06	0	0.000221415	0.00249255	MET
K03222	0	9.72062e-07	0	0.00744637	0.0138544	MET
K06168	0.000303828	0.000235624	0.000270641	0.0326308	0.048056	MC
K19055	6.92444e-05	3.53608e-05	6.99368e-05	0.0201914	0.0315786	NC
K03226	0	9.02091e-07	0	0.0185548	0.029433	MET
K09998	0	1.0383e-06	0	0.00188988	0.00527226	MET
K03224	9.70582e-07	1.07285e-07	0	0.00103182	0.00364216	MC
K03225	1.26627e-07	1.21182e-06	0	0.0230395	0.0353929	MET
K13020	0	0	1.41027e-07	0.0017995	0.00512534	NC
K09999	2.36115e-07	6.1474e-07	0	0.00304322	0.00720178	MET
K09471	0	3.71047e-07	0	0.0310492	0.0460901	MET
K01630	4.96385e-06	7.221e-06	2.25368e-07	0.000457378	0.00249255	MET
K02401	3.81425e-05	6.98856e-05	6.97514e-05	0.0323869	0.0478176	MET
K02400	4.04691e-05	7.46973e-05	8.68157e-05	0.00240549	0.00618593	NC
K08682	3.32423e-07	1.30046e-06	0	0.00165299	0.00486419	MET
K16960	8.20194e-07	1.78027e-06	4.10153e-06	0.00790705	0.0144186	NC
K08308	0	7.12227e-07	0	0.00403655	0.0087923	MET
K12151	1.22198e-07	2.59051e-07	0	0.0308154	0.0457722	MET
K11755	0.000200847	0.000164037	0.000120931	0.00022656	0.00249255	MC
K11754	0.000281395	0.000245062	0.000285082	0.00114483	0.00385462	NC
K11751	3.07259e-05	2.9023e-05	4.16938e-06	0.000460821	0.00249255	MC
K11750	2.96485e-07	1.16957e-06	0	0.00186857	0.0052631	MET
K11753	0.000174628	0.000215524	8.39254e-05	0.000243596	0.00249255	MET
K19508	1.12239e-05	2.11566e-05	1.48959e-06	0.000631445	0.00277931	MET
K00681	3.355e-05	2.84911e-05	4.17462e-06	0.000460821	0.00249255	MC
K07407	0.00048991	0.000479722	0.000370725	0.00396599	0.00865071	MC
K06041	0.000238655	0.000267766	0.000165672	0.000263225	0.00249255	MET
K01681	0.00019344	0.000220378	0.000105293	0.000109455	0.00249255	MET
K19504	1.32957e-06	2.61574e-07	2.2406e-06	0.0279124	0.0418193	NC
K19505	2.26988e-06	4.25868e-06	7.59117e-07	0.0057417	0.0113618	MET
K05779	1.83802e-07	7.02378e-07	0	0.00511901	0.0104132	MET
K00685	0	0	1.79356e-06	3.69998e-05	0.00249255	NC
K09790	7.30682e-05	9.57039e-05	1.68875e-05	0.000341385	0.00249255	MET
K11991	0.000335827	0.000255063	0.000280733	0.00483197	0.00997142	MC
K09793	5.8022e-05	5.8511e-05	3.32046e-05	0.0249097	0.0378276	MET
K09798	5.27774e-07	1.67164e-05	4.4019e-07	0.000433985	0.00249255	MET
K09799	1.37444e-06	8.94756e-07	4.217e-07	0.00927901	0.0164078	MC
K02813	2.98862e-07	1.25926e-06	0	0.00571465	0.0113371	MET
K02344	3.35761e-07	7.63651e-07	0	0.00192429	0.00531743	MET
K02402	1.46195e-07	8.79534e-07	0	0.0134452	0.0222735	MET
K18581	2.89902e-05	6.21872e-05	0.000109912	0.000224306	0.00249255	NC
K03803	5.2301e-05	6.49089e-05	2.59625e-05	0.000655574	0.00284529	MET
K07090	0.000216956	0.000185129	9.28997e-05	0.000802724	0.00316348	MC
K07095	0.00042273	0.000331278	0.000282323	0.00149969	0.00455629	MC
K19611	2.70353e-07	2.05173e-06	0	0.000122301	0.00249255	MET
K07099	2.47258e-05	2.62885e-05	1.51176e-05	0.0201914	0.0315786	MET
K07098	0.000363219	0.000316685	0.0003067	0.00196453	0.00540623	MC
K09612	3.35438e-07	2.12205e-06	0	0.000604137	0.00271745	MET
K10972	1.7763e-07	1.01248e-06	0	0.00213759	0.00572393	MET
K10973	2.51046e-07	1.14317e-06	0	0.00326296	0.00752982	MET
K10974	1.06033e-05	1.63767e-05	2.13709e-06	0.000224306	0.00249255	MET
K07566	0.000265896	0.000250648	0.000198135	0.00628242	0.0121185	MC
K07568	0.00063616	0.000436425	0.000516282	0.00796658	0.0145045	MC
K10979	3.25069e-06	5.17384e-06	1.00848e-05	0.0245388	0.0373886	NC
K11198	8.10606e-07	3.1526e-06	0	0.000148961	0.00249255	MET
K05982	3.40136e-07	4.23305e-06	4.24371e-06	0.000460821	0.00249255	NC
K11191	1.77496e-07	1.24294e-06	0	0.000252336	0.00249255	MET
K09861	0.000202204	0.000201993	5.48465e-05	0.000457378	0.00249255	MC
K08973	0	0	1.90845e-06	1.839e-05	0.00249255	NC
K19714	0	0	2.26334e-07	0.0291969	0.0435482	NC
K10711	4.95609e-08	1.10931e-06	0	0.00965273	0.0169276	MET
K01929	0.000345963	0.00029385	0.000279895	0.00696053	0.0131283	MC
K01928	0.000368244	0.000335994	0.000309974	0.0162445	0.0262135	MC
K06904	2.82992e-05	2.01406e-05	8.23784e-06	0.0105408	0.0182182	MC
K01921	0.000318877	0.000293366	0.000278677	0.00790705	0.0144186	MC
K01920	4.27928e-07	1.85326e-06	0	0.00077766	0.00309054	MET
K11783	0	0	2.60105e-07	0.000522133	0.00262472	NC
K11178	1.20416e-07	9.80421e-07	0	0.00771256	0.014119	MET
K01924	0.0003603	0.00034429	0.00032893	0.00757805	0.0139659	MC
K19131	8.7247e-07	0	3.75442e-07	0.00404314	0.00880204	MC
K07788	1.93343e-07	1.31795e-06	0	0.00420313	0.00900891	MET
K00324	3.61158e-07	1.25644e-05	5.90593e-07	0.00247256	0.00625169	MET
K00325	1.78219e-07	1.31783e-05	4.77028e-07	0.00103905	0.00365389	MET
K07784	1.94451e-07	7.68941e-07	0	0.000376787	0.00249255	MET
K07787	1.79778e-05	2.84772e-05	1.77837e-07	0.000283018	0.00249255	MET
K07786	1.8105e-07	7.0886e-07	0	0.000177706	0.00249255	MET
K05946	2.15452e-05	0.000149232	5.45546e-05	0.000123102	0.00249255	MET
K13735	1.53757e-06	4.36299e-06	0	0.000263715	0.00249255	MET
K06946	8.12951e-08	3.35723e-07	2.43692e-06	0.0020637	0.00559116	NC
K06413	7.43244e-08	0	1.41136e-05	0.000255686	0.00249255	NC
K06942	0.000171343	0.000255099	0.000174111	0.00412784	0.00887525	MET
K07148	0.000174732	0.000244653	0.000111868	0.000460821	0.00249255	MET
K07147	7.89069e-08	4.7553e-07	0	0.0106983	0.0184426	MET
K07146	1.67706e-06	2.12208e-06	0	0.000279839	0.00249255	MET
K10804	2.96347e-07	1.39439e-06	0	0.00048182	0.00254836	MET
K13888	1.51796e-06	1.36337e-06	3.1629e-08	0.00168578	0.00494821	MC
K06948	3.3692e-06	2.51409e-06	0	0.000263715	0.00249255	MC
K07140	3.24883e-07	6.4063e-07	0	0.00320929	0.00744159	MET
K09136	4.84842e-07	1.68053e-06	0	0.00255204	0.00640962	MET
K01817	9.99811e-05	0.000110536	2.92459e-05	0.000433985	0.00249255	MET
K01816	2.01646e-05	2.37823e-05	4.60577e-06	0.000433985	0.00249255	MET
K01815	2.49036e-05	5.47875e-05	8.63012e-05	0.000272601	0.00249255	NC
K01814	0.000200548	0.000184597	0.00014412	0.00131687	0.00423441	MC
K01813	6.35027e-05	8.99043e-05	0.000113212	0.0018875	0.00526876	NC
K01812	0.000117317	0.000123871	0.000194029	0.000461975	0.00249255	NC
K01811	0.000204973	0.000188849	0.000469407	0.000283018	0.00249255	NC
K05804	1.02478e-07	1.47411e-06	0	0.00169713	0.00496002	MET
K05805	4.76935e-06	2.95402e-06	7.32015e-07	0.00203451	0.00554327	MC
K18369	8.02108e-05	4.26538e-05	0.000108671	0.000622044	0.00276398	NC
K05807	0.000118568	0.000193844	7.1047e-05	0.000192099	0.00249255	MET
K05800	4.9463e-07	1.60073e-05	3.00861e-06	0.000605171	0.00271745	MET
K05801	5.84395e-05	5.48208e-05	8.82862e-06	0.000408712	0.00249255	MC
K05802	4.29279e-07	2.18809e-06	0	0.000242332	0.00249255	MET
K01818	0.000222069	0.00016491	8.62263e-05	0.000147379	0.00249255	MC
K04047	8.67583e-05	8.94374e-05	4.23448e-06	0.000461975	0.00249255	MET
K04046	7.00496e-07	1.06117e-05	5.69657e-08	0.000134627	0.00249255	MET
K04044	4.11706e-06	2.87261e-06	4.54298e-07	0.00148848	0.00455219	MC
K04042	3.27306e-05	8.54768e-05	2.61264e-05	0.000346544	0.00249255	MET
K04566	0	0	7.26728e-07	0.000110201	0.00249255	NC
K19167	1.3724e-07	1.10848e-06	6.88448e-06	0.00670873	0.0127877	NC
K00782	4.36899e-05	9.14638e-05	2.16661e-05	0.00101537	0.0036023	MET
K00784	0.000330726	0.000250185	0.000148796	9.68352e-05	0.00249255	MC
K00788	0.000329542	0.000365224	0.000182144	0.000451697	0.00249255	MET
K00789	0.000312198	0.000322673	0.000389818	0.0181788	0.0289645	NC
K00033	2.98997e-05	8.12373e-05	9.29065e-06	0.000187356	0.00249255	MET
K00031	0.00013165	0.00019247	6.48955e-05	0.000349153	0.00249255	MET
K15531	1.7233e-05	9.77532e-06	3.2816e-05	0.00191603	0.00531743	NC
K01258	0.000339398	0.000276296	0.000273014	0.0010701	0.0037329	MC
K01255	1.5522e-05	5.62789e-05	1.37237e-05	0.00603608	0.0117845	MET
K01256	5.09612e-05	9.66182e-05	4.86997e-06	0.000123102	0.00249255	MET
K01251	0.000181471	0.000186775	6.25175e-05	0.000457378	0.00249255	MET
K01252	0	3.00617e-07	0	0.00250057	0.00630885	MET
K19353	1.72765e-05	1.01928e-06	9.87306e-07	0.00175112	0.0050511	MC
K19355	0.000129922	6.78062e-05	7.64734e-05	0.024234	0.0369966	MC
K19354	2.07399e-05	1.59749e-06	1.05702e-05	0.00515649	0.0104156	MC
K10026	2.71285e-07	1.93854e-06	9.22151e-06	0.000104377	0.00249255	NC
K02062	4.94585e-07	1.50394e-06	0	0.00408466	0.00883937	MET
K09002	0	0	3.0756e-06	0.000132237	0.00249255	NC
K09003	4.16956e-06	1.2025e-05	4.20797e-07	0.000873939	0.00330202	MET
K09004	0	0	2.27521e-07	0.000572748	0.00267644	NC
K09005	6.19148e-06	1.65843e-06	4.55961e-07	0.00561395	0.0111991	MC
K01048	2.79652e-07	3.86099e-07	8.83846e-06	0.000761718	0.00309054	NC
K08234	1.77381e-05	3.33059e-05	4.71571e-06	0.00232857	0.00603465	MET
K11784	0	0	3.1849e-06	0.000126296	0.00249255	NC
K01322	5.51548e-05	4.22555e-05	0.000148546	0.000272601	0.00249255	NC
K00254	9.8769e-06	3.88975e-05	3.27706e-05	0.00311976	0.00731119	MET
K01079	0.000137976	0.000109675	0.000178834	0.0128746	0.0216119	NC
K02243	3.04851e-06	4.47213e-06	8.17536e-07	0.00357962	0.00804466	MET
K15876	2.37631e-05	3.86306e-05	2.79733e-06	0.000263225	0.00249255	MET
K02242	1.09604e-06	1.24542e-06	0	0.000799032	0.00316227	MET
K01071	8.34953e-07	1.42648e-06	0	0.00552928	0.0110586	MET
K01070	5.07055e-07	1.73754e-06	0	0.00066167	0.00286903	MET
K01077	0.000284481	0.000257783	0.000136341	0.000109455	0.00249255	MC
K00812	0.000499742	0.000385477	0.000376073	0.00513077	0.0104132	MC
K02536	0.000217221	0.000247307	0.00010475	0.000631445	0.00277931	MET
K13614	4.08508e-07	3.83385e-08	0	0.000184214	0.00249255	MC
K00817	0.000213569	0.00016434	0.000134888	0.00628242	0.0121185	MC
K00819	2.29919e-05	5.3411e-05	9.55298e-07	0.000109455	0.00249255	MET
K01807	1.79987e-05	4.31332e-05	2.42864e-06	0.000109455	0.00249255	MET
K02246	2.31862e-06	2.60101e-06	0	0.000815586	0.00318439	MET
K08304	3.98567e-06	1.21677e-05	7.56226e-07	0.000169951	0.00249255	MET
K08305	5.1166e-06	1.27621e-05	8.5981e-07	0.000197455	0.00249255	MET
K08300	5.81335e-06	2.16721e-05	4.77117e-06	0.000839671	0.00324877	MET
K08303	0.000645963	0.000614111	0.000546338	0.00464251	0.00967017	MC
K19163	0	1.5123e-07	0	0.01054	0.0182182	MET
K02244	2.44126e-06	1.76978e-06	0	0.000318293	0.00249255	MC
K19997	2.9351e-05	7.11608e-05	7.70935e-05	0.00871683	0.0155908	NC
K05794	4.83999e-07	6.71898e-06	2.02546e-06	0.00963358	0.0169276	MET
K05795	0.00016095	3.30378e-05	0.000205814	0.000123102	0.00249255	NC
K01499	6.91753e-07	0	0	0.0220835	0.034183	MC
K05790	1.1385e-07	1.55592e-06	0	0.0004633	0.00249552	MET
K05791	5.00476e-05	9.35722e-06	3.93975e-05	0.000741007	0.00303697	MC
K05792	5.06408e-05	8.71549e-06	3.02467e-05	0.000321504	0.00249255	MC
K01492	2.89429e-05	7.9926e-05	1.93101e-06	0.00013776	0.00249255	MET
K01491	0.000337696	0.000314473	0.000301092	0.00384878	0.00843444	MC
K05798	2.34209e-07	1.32083e-06	0	0.00100711	0.00357929	MET
K05799	1.36281e-06	8.28363e-06	2.56377e-06	0.00056567	0.00267644	MET
K01673	0.000147017	0.000139936	8.06303e-05	0.000443861	0.00249255	MC
K01671	4.17927e-07	2.11947e-06	0	0.000281155	0.00249255	MET
K02419	3.52822e-05	5.37768e-05	6.55776e-05	0.00953773	0.0167763	NC
K05373	1.70212e-07	3.20464e-07	0	0.000446075	0.00249255	MET
K01679	3.59765e-05	2.94082e-05	1.0728e-05	0.000711952	0.00297124	MC
K02416	3.44557e-05	6.99196e-05	6.22304e-05	0.00500409	0.0102586	MET
K02417	3.18408e-05	6.11655e-05	9.15766e-05	0.00167407	0.00491691	NC
K02414	1.12377e-05	8.84075e-06	2.61511e-06	0.00135697	0.00430214	MC
K01476	6.76449e-05	5.09923e-05	5.39507e-07	0.000322309	0.00249255	MC
K01470	6.24049e-05	9.85602e-05	3.53437e-05	0.00524752	0.0105862	MET
K01473	1.97671e-06	9.74977e-07	6.05003e-07	0.0177743	0.0283491	MC
K00433	4.41671e-06	0	0	5.6944e-05	0.00249255	MC
K02782	2.3684e-06	4.70962e-06	9.3045e-07	0.0158039	0.0256799	MET
K02783	1.00048e-06	4.9925e-06	1.96543e-07	0.0199598	0.0312898	MET
K02781	1.22444e-06	5.23849e-06	0	0.000122301	0.00249255	MET
K02787	8.34392e-06	5.31634e-06	6.63105e-07	0.00119453	0.0039648	MC
K02784	1.40615e-07	7.95683e-07	0	0.00601062	0.0117692	MET
K18008	1.30894e-06	1.73634e-05	5.61605e-06	0.0107807	0.0185163	MET
K02899	0.000110185	0.000144628	0.000137346	0.0126829	0.0213285	MET
K00124	8.39761e-06	4.3742e-06	1.28695e-06	0.00180445	0.00512534	MC
K02895	0.000121437	0.000157584	0.00014021	0.0245388	0.0373886	MET
K13051	2.41226e-05	5.64851e-05	6.63145e-07	0.00013776	0.00249255	MET
K07708	4.15749e-07	2.76815e-06	5.86809e-07	0.00209647	0.0056462	MET
K01787	0.00016442	0.000168976	6.24458e-05	0.000443861	0.00249255	MET
K01786	3.22169e-05	3.00718e-05	6.74179e-05	0.00925585	0.0163792	NC
K01785	0.000382083	0.000403124	0.000480194	0.0311949	0.0461452	NC
K01784	0.000350397	0.000314898	0.000294404	0.0162852	0.026261	MC
K01782	8.29362e-08	7.18087e-07	0	0.00271057	0.00664831	MET
K02526	3.71975e-06	4.15452e-06	0	0.000767503	0.00309054	MET
K03309	1.10907e-06	1.43524e-05	4.2255e-06	0.0147354	0.0241624	MET
K02521	6.29473e-07	1.96427e-06	0	0.000620291	0.00276145	MET
K03304	3.43571e-08	4.331e-07	1.71657e-06	0.00428445	0.00913448	NC
K03307	0.000217953	0.000190463	0.000286814	0.000961035	0.00350591	NC
K03306	5.92565e-05	7.42248e-05	4.57148e-06	0.000224306	0.00249255	MET
K03300	1.10796e-06	6.21881e-06	3.7739e-06	0.00564209	0.0112265	MET
K03303	1.62295e-05	9.59798e-05	6.30639e-05	0.000767402	0.00309054	MET
K10680	1.49659e-07	6.31678e-07	0	0.000540978	0.00266327	MET
K20527	0	1.53475e-05	4.47136e-06	0.000756467	0.00307191	MET
K20525	0	1.68136e-08	5.70993e-06	0.00201667	0.00551396	NC
K03780	6.40127e-06	2.83144e-06	1.21604e-06	0.0109163	0.0186873	MC
K18015	8.41884e-08	7.2579e-07	0	0.00509792	0.010398	MET
K03782	3.38555e-07	2.25216e-06	0	0.000964182	0.00350591	MET
K03785	2.91168e-05	3.25825e-05	7.16281e-06	0.000433985	0.00249255	MET
K03787	0.000293602	0.000222148	0.000238542	0.00636144	0.0122356	MC
K03786	0.000219507	0.000197393	0.000279861	0.004097	0.00884967	NC
K03789	1.34036e-05	1.81605e-05	4.36419e-06	0.000767402	0.00309054	MET
K03788	2.48659e-07	1.29666e-06	0	0.000741359	0.00303697	MET
K02588	4.95484e-06	4.61219e-06	0	0.000519532	0.00262032	MC
K03411	4.28874e-05	3.53202e-05	6.27909e-05	0.0271196	0.0406576	NC
K03410	2.45935e-05	1.98552e-05	5.24892e-05	0.00500409	0.0102586	NC
K03415	2.5095e-05	3.38714e-05	5.89295e-05	0.00767337	0.0141081	NC
K03417	1.07231e-07	5.93292e-06	0	0.000150443	0.00249255	MET
K02570	0	3.75384e-07	0	0.00261034	0.00648922	MET
K18820	1.801e-06	5.32569e-06	1.91956e-05	0.00145536	0.00452199	NC
K06186	0	1.30687e-06	0	0.00313113	0.00731119	MET
K18827	4.55609e-07	7.30991e-08	1.64136e-06	0.0192188	0.0303524	NC
K19423	0	0	6.70281e-06	0.000476378	0.0025425	NC
K19422	2.78292e-07	3.35311e-07	9.28615e-06	0.000714003	0.00297714	NC
K17733	1.67156e-05	1.02267e-05	1.06777e-06	0.00796658	0.0145045	MC
K02589	0	4.57656e-07	0	0.000578778	0.00267644	MET
K17735	1.16094e-06	7.804e-07	0	0.000805379	0.00316593	MC
K19425	0	5.12703e-07	0	0.00573201	0.0113618	MET
K11719	2.71013e-07	1.08159e-06	0	0.000851399	0.00326491	MET
K06173	0.000329842	0.000266622	0.000262642	0.0127784	0.0214581	MC
K06175	5.08959e-06	5.67467e-07	9.76688e-08	0.00621235	0.0120878	MC
K06177	7.93601e-05	7.49559e-05	2.27333e-05	0.000460821	0.00249255	MC
K06176	4.20206e-07	1.07686e-06	2.46928e-06	0.0224268	0.0345539	NC
K03230	9.01247e-07	1.53989e-07	2.01078e-08	0.00677664	0.012896	MC
K09903	0.000261372	0.000310293	0.000212379	0.00067723	0.00288564	MET
K16885	0	0	2.43041e-07	0.00154156	0.00464457	NC
K16886	0	0	3.90796e-07	0.00431362	0.00916081	NC
K16887	0	0	3.47826e-07	0.000522133	0.00262472	NC
K16881	3.64979e-06	8.32802e-06	1.20229e-06	0.00145536	0.00452199	MET
K05937	3.63415e-07	2.88924e-07	0	0.0124411	0.0209595	MC
K19340	3.33862e-06	0	0	1.839e-05	0.00249255	MC
K18344	1.76551e-05	2.36692e-05	6.28682e-05	0.00148848	0.00455219	NC
K19341	2.93214e-06	0	0	3.69998e-05	0.00249255	MC
K09907	3.3539e-07	6.80463e-07	0	0.00197291	0.00540698	MET
K05374	4.50691e-08	6.49734e-07	0	0.0020938	0.0056462	MET
K09906	4.73452e-07	1.36884e-06	0	0.00246805	0.00625169	MET
K10010	2.16417e-06	4.85026e-06	6.55326e-06	0.0184997	0.0294056	NC
K12144	0	1.68365e-06	0	0.0194346	0.030662	MET
K12147	1.72763e-07	7.87154e-07	0	0.00533721	0.0107388	MET
K12146	1.23581e-07	1.02241e-06	0	0.0168495	0.0270682	MET
K12141	6.54245e-06	1.59818e-05	2.1495e-05	0.00054349	0.00266327	NC
K12140	6.37565e-06	1.62387e-05	1.65094e-05	0.00636144	0.0122356	NC
K12142	1.30498e-07	6.706e-07	0	0.00965273	0.0169276	MET
K12149	1.17358e-07	9.51263e-07	0	0.00525677	0.0105862	MET
K12148	0	6.81865e-07	0	0.00205762	0.00558992	MET
K07312	4.15901e-08	2.60306e-07	0	0.00267406	0.00661432	MET
K07310	1.35693e-07	5.18962e-07	0	0.00278727	0.00671381	MET
K07311	7.94297e-08	1.17356e-06	0	0.00707414	0.013241	MET
K07316	0.000104953	0.000179327	0.000225532	0.000970693	0.00350591	NC
K07317	1.8043e-06	2.46502e-06	3.28914e-05	0.000422213	0.00249255	NC
K07314	2.58704e-07	1.45665e-06	0	0.00192429	0.00531743	MET
K07315	1.31144e-05	3.49157e-05	3.31954e-05	0.0289409	0.043194	MET
K16088	2.19556e-07	8.06133e-07	0	0.00230324	0.00599896	MET
K16089	0.000306466	0.000319899	0.000183835	0.000457378	0.00249255	MET
K16087	4.42932e-06	8.57444e-07	5.59762e-07	0.00328792	0.00755639	MC
K12527	1.00795e-05	2.06368e-05	1.05116e-05	0.0311949	0.0461452	MET
K12525	1.74559e-07	8.85206e-07	0	0.00667668	0.0127422	MET
K12524	0.0002253	0.000166988	0.000161641	0.0109163	0.0186873	MC
K11614	1.60836e-06	3.45403e-06	0	0.000346107	0.00249255	MET
K09786	9.47388e-08	8.22356e-07	0	0.00243189	0.00620937	MET
K11617	9.24924e-07	9.9101e-07	0	0.000345292	0.00249255	MET
K11963	3.05164e-07	0	1.54514e-06	0.0287164	0.0429138	NC
K11960	0	0	2.11705e-06	0.000110201	0.00249255	NC
K12528	9.15298e-08	8.71755e-07	0	0.00263007	0.00651933	MET
K16066	4.03417e-07	6.26155e-07	2.77346e-06	0.00770034	0.014119	NC
K06333	6.38407e-06	1.02081e-05	3.92741e-06	0.000367973	0.00249255	MET
K07584	1.38626e-05	1.56052e-05	5.45412e-06	0.00448283	0.0094406	MET
K04755	3.87824e-06	1.74389e-06	6.67008e-07	0.012906	0.0216335	MC
K10561	5.12516e-07	6.74089e-06	4.06053e-06	0.00127157	0.00415262	MET
K10560	5.75266e-07	6.77933e-06	3.31626e-06	0.00247256	0.00625169	MET
K10562	2.88982e-06	8.87856e-06	3.87286e-06	0.0126829	0.0213285	MET
K18778	4.77352e-07	2.15329e-06	0	0.00181088	0.00512534	MET
K02838	0.000374921	0.000319588	0.000312501	0.0224268	0.0345539	MC
K06858	4.16791e-07	1.7533e-06	0	0.00077766	0.00309054	MET
K02839	6.41882e-05	3.24649e-05	0.000107141	0.000296786	0.00249255	NC
K19229	4.94336e-08	1.27985e-06	0	0.000265509	0.00249255	MET
K06859	3.02676e-05	2.8571e-05	2.11166e-06	0.000460821	0.00249255	MC
K10961	0	0	3.54122e-08	0.01054	0.0182182	NC
K07559	9.81383e-06	1.37784e-05	2.44311e-05	0.00092798	0.00342665	NC
K07229	3.18025e-07	1.20314e-06	0	0.00458629	0.00958727	MET
K07227	6.35313e-08	4.7939e-07	0	0.0015374	0.00463504	MET
K07224	2.88174e-07	8.68823e-07	0	0.00108599	0.0037329	MET
K07225	1.74356e-07	3.51475e-07	0	0.00362688	0.00809633	MET
K07223	2.42424e-05	2.58222e-05	1.30235e-06	0.000451697	0.00249255	MET
K07552	9.05876e-06	2.93868e-05	5.1611e-05	0.000293833	0.00249255	NC
K07221	5.76421e-05	0.000117672	0.000114394	0.0197916	0.0310887	MET
K06310	5.47763e-06	4.00444e-06	1.05016e-05	0.0326308	0.048056	NC
K19227	4.14378e-08	7.81929e-07	0	0.0230395	0.0353929	MET
K06317	8.77185e-07	5.11105e-06	3.2786e-07	0.0246751	0.0375841	MET
K10709	7.72366e-07	5.17521e-06	1.80253e-06	0.0109163	0.0186873	MET
K10708	8.63018e-06	3.68559e-06	6.06056e-07	0.000422213	0.00249255	MC
K05739	6.38415e-07	1.97275e-06	0	0.000411053	0.00249255	MET
K03757	4.60221e-07	7.10552e-07	0	0.000682078	0.00289836	MET
K11381	4.23592e-05	4.67406e-05	6.93418e-06	0.000422213	0.00249255	MET
K11312	1.23772e-07	2.53658e-06	0	0.00431205	0.00916081	MET
K03207	4.41575e-06	0	0	0.00313113	0.00731119	MC
K03752	1.27883e-06	2.14768e-06	0	0.0024645	0.00625169	MET
K05979	0	3.1539e-06	7.85989e-06	0.000593892	0.00270319	NC
K20339	4.55493e-07	1.14784e-06	0	0.000814641	0.00318357	MET
K03753	7.45907e-06	4.86139e-06	1.99105e-07	0.000444972	0.00249255	MC
K00335	3.48121e-05	3.90456e-05	1.94236e-05	0.004905	0.0100954	MET
K00334	2.57006e-05	5.29865e-05	1.33043e-05	0.00024543	0.00249255	MET
K08651	0	0	2.00022e-06	5.6944e-05	0.00249255	NC
K00338	0.000185958	0.000159716	5.96888e-05	0.000485661	0.00254836	MC
K19775	9.68989e-08	7.40514e-07	0	0.000420714	0.00249255	MET
K18838	0	8.63381e-07	0	0.000640141	0.00280437	MET
K15586	2.19127e-07	6.50576e-06	3.21135e-07	0.000548795	0.00267644	MET
K16264	3.01189e-05	5.87637e-05	8.36978e-05	0.000205513	0.00249255	NC
K03617	0.000166372	0.000200937	0.000219284	0.0132667	0.0220012	NC
K07138	0.000272764	0.000243816	0.000314169	0.00373503	0.00822336	NC
K06957	3.73848e-07	1.37581e-06	0	0.00048182	0.00254836	MET
K06400	1.38765e-05	9.79062e-06	3.938e-05	0.00500409	0.0102586	NC
K16263	2.99486e-07	9.39267e-07	0	0.000177706	0.00249255	MET
K07132	7.32656e-07	4.08237e-06	3.92114e-06	0.0158545	0.0257532	MET
K07133	0.000786432	0.000730987	0.00112334	0.00204983	0.005572	NC
K06959	0.000280948	0.000206857	0.00022353	0.000865243	0.00327978	MC
K09128	7.54407e-06	8.78314e-06	0	0.000409238	0.00249255	MET
K09123	9.60328e-06	1.10105e-05	4.62832e-07	0.000393669	0.00249255	MET
K03613	0.000195721	0.000215409	0.000231447	0.0177743	0.0283491	NC
K09125	0.000255225	0.000188429	0.000157383	0.00103848	0.00365389	MC
K09124	0	1.41229e-05	1.41759e-07	9.83493e-05	0.00249255	MET
K05819	8.80187e-08	9.82663e-07	0	0.00965273	0.0169276	MET
K03229	8.88879e-07	1.0157e-06	3.29003e-08	0.00401394	0.00875121	MET
K01867	0.000367954	0.000343646	0.000330587	0.00266514	0.00659575	MC
K13016	4.08603e-05	2.16239e-05	1.94427e-05	0.0188734	0.0298776	MC
K05813	4.63716e-06	7.5849e-06	1.56817e-07	0.000733634	0.00303192	MET
K05812	2.65481e-07	1.05851e-06	0	0.000928937	0.00342665	MET
K01868	0.000285359	0.000267714	0.00031981	0.00276698	0.00671381	NC
K05817	1.99549e-07	7.77744e-07	0	0.0250237	0.0379172	MET
K05816	1.59939e-06	6.06468e-06	2.70764e-07	0.00372596	0.00822336	MET
K05815	5.93372e-06	1.00051e-05	6.74532e-07	0.000631445	0.00277931	MET
K05814	7.01407e-06	1.13586e-05	6.52883e-07	0.000631445	0.00277931	MET
K04032	1.3727e-06	3.99474e-06	0	0.000279839	0.00249255	MET
K04033	2.6588e-07	1.41943e-06	0	0.000376078	0.00249255	MET
K04030	2.79089e-06	4.33534e-06	6.28721e-07	0.000551703	0.00267644	MET
K18554	9.5858e-07	4.4614e-07	8.97997e-08	0.0319055	0.0471514	MC
K03437	0.000313626	0.000232456	0.000290257	0.00555809	0.0110972	MC
K01892	0.000342091	0.000324239	0.000307392	0.00315111	0.00734316	MC
K07045	7.93216e-05	8.48374e-05	5.19762e-05	0.0158831	0.0257549	MET
K00029	0.000250795	0.0001604	0.000175643	0.0307305	0.0456704	MC
K00799	1.6067e-06	1.30343e-05	0	7.18837e-05	0.00249255	MET
K00797	3.16622e-06	4.02869e-06	2.39894e-05	0.00127157	0.00415262	NC
K09703	2.76994e-06	2.73949e-06	2.36663e-07	0.000739157	0.00303697	MC
K00020	5.56526e-06	1.67877e-05	5.42627e-06	0.00925585	0.0163792	MET
K09017	1.38996e-07	1.0916e-06	0	0.00626466	0.0121133	MET
K09016	9.17846e-08	4.48055e-07	0	0.00444505	0.00939719	MET
K09015	0.000271636	0.000242585	0.000209061	0.0126829	0.0213285	MC
K09014	0.000302894	0.000262677	0.000245461	0.0194969	0.0306981	MC
K09011	0.000161512	0.000147867	4.40174e-05	0.000341385	0.00249255	MC
K01144	5.77786e-05	9.79632e-05	4.75369e-05	0.00448283	0.0094406	MET
K01261	2.66944e-06	1.84096e-06	0	0.000301769	0.00249255	MC
K01262	0.000459819	0.000460804	0.000323936	0.000568505	0.00267644	MET
K01265	0.000421973	0.000474874	0.000361903	0.000802724	0.00316348	MET
K01266	7.28288e-06	1.17234e-05	1.91294e-06	0.000430743	0.00249255	MET
K08227	1.1062e-07	9.76751e-07	0	0.00444505	0.00939719	MET
K06144	3.28048e-07	1.18038e-06	0	0.00163976	0.00485587	MET
K08225	2.37447e-07	1.14887e-06	0	0.000239861	0.00249255	MET
K08224	4.62254e-07	4.17654e-06	3.28872e-07	0.000451697	0.00249255	MET
K08223	0.000202858	0.000117679	0.000150806	0.0224268	0.0345539	MC
K08222	0	5.81108e-08	4.19748e-07	0.0240661	0.0368005	NC
K10039	6.17037e-08	3.9488e-07	2.15693e-06	0.0111979	0.0191203	NC
K06145	2.49618e-07	1.02686e-06	0	0.00748669	0.0138762	MET
K10037	1.34484e-06	1.46215e-05	4.27157e-06	0.0241735	0.0369284	MET
K06146	2.35012e-07	5.96529e-07	0	0.00271057	0.00664831	MET
K06147	0.00079648	0.000891432	0.00162386	0.000443861	0.00249255	NC
K19168	8.71558e-08	1.09958e-06	0	0.00771256	0.014119	MET
K17713	4.93788e-07	9.197e-07	0	0.000652169	0.00283916	MET
K04784	1.05117e-07	4.49187e-07	0	0.000779583	0.00309054	MET
K04786	6.61704e-08	4.51405e-07	0	0.000148961	0.00249255	MET
K01142	0.000294223	0.000279743	0.000112934	0.000408712	0.00249255	MC
K19162	2.37748e-07	1.5445e-06	0	0.00096982	0.00350591	MET
K04783	1.35321e-07	3.23881e-07	0	0.000540978	0.00266327	MET
K00249	0	2.7105e-07	8.98247e-08	0.00811179	0.0147115	MET
K01318	0	0	1.23149e-07	0.00176465	0.00508384	NC
K00243	0.00027439	0.000173957	0.000151427	0.00489275	0.010079	MC
K00244	7.27638e-05	4.16787e-05	1.05238e-05	0.000393669	0.00249255	MC
K00247	1.00774e-07	8.87307e-07	0	0.0269998	0.0406343	MET
K00246	3.19004e-07	5.52881e-07	1.97063e-06	0.0243731	0.0371969	NC
K04767	4.81876e-06	3.12909e-05	6.98033e-06	0.00373503	0.00822336	MET
K04764	5.38246e-06	1.74847e-05	4.45028e-06	0.0113334	0.0193094	MET
K02669	2.71758e-05	3.3581e-05	7.10345e-05	0.00655518	0.0125359	NC
K04760	5.0783e-06	1.8186e-06	7.49465e-07	0.00370712	0.00820486	MC
K04761	5.58989e-05	9.9881e-05	3.54551e-05	0.000865243	0.00327978	MET
K02666	1.54541e-05	1.23298e-05	3.5431e-06	0.0147354	0.0241624	MC
K02405	2.73034e-05	6.02421e-05	6.22469e-05	0.0167392	0.0269374	NC
K13607	6.43415e-07	6.41849e-07	0	0.00722625	0.0134932	MC
K00806	0.000399037	0.000366024	0.000328572	0.0015531	0.00466048	MC
K00803	6.05862e-07	7.23986e-06	5.89688e-07	0.000655574	0.00284529	MET
K08313	5.31533e-08	3.70747e-07	0	0.00361636	0.00808444	MET
K08312	4.20822e-07	1.57528e-06	0	0.00165299	0.00486419	MET
K15461	4.15571e-06	3.23208e-06	7.24345e-07	0.00513077	0.0104132	MC
K08316	1.74058e-06	2.15457e-05	5.79572e-06	0.000670491	0.00286976	MET
K08315	1.56546e-07	1.46995e-06	0	0.00192429	0.00531743	MET
K08314	9.80822e-07	6.99362e-06	0	0.000151234	0.00249255	MET
K08319	3.25123e-07	9.64199e-07	0	0.00108599	0.0037329	MET
K08318	3.17124e-07	1.6452e-06	0	0.000705801	0.00297124	MET
K05782	1.51765e-06	1.7311e-06	0	0.000805379	0.00316593	MET
K05781	2.60424e-06	8.95515e-06	0	0.000230817	0.00249255	MET
K00826	0.000332238	0.000321098	0.000284276	0.02851	0.042619	MC
K05787	0	9.92688e-07	0	0.00130835	0.00423129	MET
K05786	4.68101e-06	4.18386e-06	2.02883e-07	0.000711952	0.00297124	MC
K05785	1.74573e-07	1.4888e-06	0	0.0146924	0.0241597	MET
K14392	1.55541e-06	1.53502e-06	0	0.000357735	0.00249255	MC
K14393	3.3756e-07	1.41156e-06	0	0.000222711	0.00249255	MET
K05789	2.14413e-07	1.09499e-06	0	0.00155482	0.00466048	MET
K05788	3.95987e-06	1.98731e-05	2.34786e-06	0.000472487	0.00252751	MET
K15268	0	6.51271e-07	0	0.00937793	0.0165389	MET
K05368	3.42776e-07	1.98526e-06	0	0.00411528	0.00886124	MET
K01689	0.000375991	0.000299052	0.000313521	0.0158831	0.0257549	MC
K01686	0.000116791	0.00018851	0.000190467	0.0132667	0.0220012	NC
K01687	0.000294951	0.000268193	0.00022456	0.000453961	0.00249255	MC
K01684	8.82418e-06	1.30977e-05	1.45964e-06	0.000377289	0.00249255	MET
K01685	5.59072e-05	7.88163e-05	0.000146814	0.000263225	0.00249255	NC
K01682	1.54518e-07	9.95735e-07	0	0.00811179	0.0147115	MET
K02404	1.77843e-05	2.66677e-05	5.13082e-05	0.00696053	0.0131283	NC
K05367	1.51697e-05	3.76696e-05	2.61171e-05	0.00279479	0.00671381	MET
K01442	0.000175381	0.000240099	0.000134824	0.000511839	0.00261594	MET
K01443	0.000363074	0.000320446	0.00011289	0.000263225	0.00249255	MC
K01444	6.60251e-07	1.66951e-06	0	0.00165299	0.00486419	MET
K06202	9.44385e-08	1.31546e-06	0	0.0230395	0.0353929	MET
K01447	3.72248e-05	5.8374e-05	2.96309e-05	0.0223149	0.0344612	MET
K01448	0.000584229	0.000455945	0.000385691	0.000183646	0.00249255	MC
K02790	3.38035e-06	6.02698e-06	1.32677e-07	0.000415495	0.00249255	MET
K02793	9.4636e-06	2.09476e-05	8.31369e-06	0.00327152	0.00752982	MET
K02795	2.58413e-05	6.20973e-05	1.14153e-05	0.004097	0.00884967	MET
K02794	3.40429e-05	7.07568e-05	1.10016e-05	0.00305035	0.00720178	MET
K02796	1.65624e-05	5.46721e-05	8.75502e-06	0.000585819	0.00267644	MET
K13049	9.52788e-06	6.02869e-06	1.17358e-06	0.00214954	0.00574277	MC
K02888	0.00016892	0.000217116	0.000212117	0.00642538	0.0123331	MET
K02406	0.000140222	0.000190942	0.000465661	0.00174239	0.00503524	NC
K02884	0.000214155	0.000248082	0.000269095	0.0132667	0.0220012	NC
K13041	3.19239e-06	0	0	3.69998e-05	0.00249255	MC
K18011	5.125e-06	1.00523e-05	1.27557e-06	7.46649e-05	0.00249255	MET
K13730	0	0	1.97693e-06	0.000572748	0.00267644	NC
K18013	1.23205e-05	1.5639e-05	1.42226e-06	0.000302781	0.00249255	MET
K18012	5.90103e-06	1.15992e-05	5.23759e-07	0.000109455	0.00249255	MET
K04564	0.000455938	0.000326096	0.000271585	0.00315111	0.00734316	MC
K04565	2.65691e-05	8.48098e-06	3.25038e-05	0.00784797	0.0143332	NC
K01040	1.45394e-05	1.13918e-05	3.01056e-06	0.00054349	0.00266327	MC
K04561	3.97299e-06	2.41909e-06	1.91868e-05	0.00385841	0.00843971	NC
K01042	8.15257e-06	2.86496e-05	9.03563e-06	0.00884856	0.0157901	MET
K02063	3.57425e-07	1.25392e-06	0	0.000525396	0.00263596	MET
K05565	0	2.86377e-07	8.90737e-08	0.0128981	0.021628	MET
K02067	0.000209882	0.00018507	0.000100667	0.000444972	0.00249255	MC
K02064	7.22755e-08	1.14477e-06	0	0.0210728	0.0328362	MET
K02241	0	0	4.5223e-07	0.00405161	0.00880204	NC
K02533	2.2594e-06	2.13994e-05	3.57056e-06	0.000905068	0.00338675	MET
K02248	2.25774e-06	1.94389e-06	0	0.000304067	0.00249255	MC
K02538	7.89068e-07	1.7484e-06	0	0.000181876	0.00249255	MET
K03336	3.61945e-06	7.95275e-06	1.76787e-05	0.000884932	0.00333815	NC
K03337	4.57834e-06	9.88356e-06	1.81688e-05	0.00696053	0.0131283	NC
K02081	4.94621e-06	7.23214e-06	1.82103e-05	0.00294543	0.00702152	NC
K02080	2.28468e-05	9.43565e-06	2.47067e-07	0.000301716	0.00249255	MC
K02083	4.01731e-06	9.57963e-06	1.02726e-06	0.000810791	0.00317651	MET
K20534	5.58288e-05	0.000128787	5.68773e-05	0.00757805	0.0139659	MET
K20531	1.22325e-07	1.42082e-05	3.55594e-06	0.00188202	0.00526876	MET
K20530	1.31692e-08	1.31144e-05	3.57215e-06	0.00216387	0.00575641	MET
K20533	0	1.43224e-05	4.27309e-06	0.000754507	0.00307191	MET
K04516	0.000266985	0.000210025	0.000207232	0.00884856	0.0157901	MC
K06219	0	1.18826e-06	0	0.00813569	0.0147148	MET
K12957	7.25971e-07	1.35988e-06	0	0.00811179	0.0147115	MET
K12952	1.02875e-05	2.80151e-05	1.85963e-05	0.0109163	0.0186873	MET
K14731	1.847e-05	8.39038e-06	2.96695e-05	0.0132667	0.0220012	NC
K07039	1.06563e-07	1.03292e-06	0	0.00811179	0.0147115	MET
K03424	0.000423209	0.000523343	0.000285724	0.000224306	0.00249255	MET
K07236	0	1.08636e-06	0	0.00405161	0.00880204	MET
K03426	0.000146949	0.000166738	7.97424e-05	0.000443861	0.00249255	MET
K03932	0	1.24438e-06	2.64968e-06	9.50671e-05	0.00249255	NC
K03933	1.9526e-06	1.58943e-06	0	0.000377512	0.00249255	MC
K03930	1.93024e-06	1.82171e-06	4.5306e-06	0.0206508	0.0322756	NC
K03931	1.9565e-06	8.67802e-05	3.1485e-05	0.000346544	0.00249255	MET
K03756	4.4541e-06	2.67971e-06	6.29012e-07	0.00298995	0.00711674	MC
K03205	0.000354052	0.000218348	0.000531015	0.00373503	0.00822336	NC
K03755	3.33256e-07	1.59792e-06	0	0.00114079	0.00385462	MET
K03200	6.93327e-08	6.23952e-07	0	0.0024218	0.00620937	MET
K03201	1.3813e-07	2.38602e-07	0	0.00181088	0.00512534	MET
K03750	1.83851e-05	3.90896e-05	1.3861e-05	0.024234	0.0369966	MET
K03203	1.96016e-07	4.87928e-07	0	0.000329583	0.00249255	MET
K18837	1.97223e-07	5.43174e-07	0	0.0284127	0.0424872	MET
K03759	1.73625e-06	2.69346e-06	7.78486e-08	0.000317826	0.00249255	MET
K19688	3.20707e-07	1.00875e-06	0	0.00811179	0.0147115	MET
K06148	4.91163e-06	6.55351e-06	1.64732e-05	0.0197916	0.0310887	NC
K06149	1.63492e-07	9.09189e-07	0	0.0027846	0.00671381	MET
K02339	3.20398e-07	2.09873e-06	0	0.000184214	0.00249255	MET
K02338	0.000255169	0.000284553	0.000152013	0.000243596	0.00249255	MET
K02337	0.000287396	0.000312844	0.000373283	0.004097	0.00884967	NC
K02336	6.03504e-07	2.31258e-06	0	0.000222711	0.00249255	MET
K06140	5.91945e-07	1.22742e-06	0	0.00131838	0.00423441	MET
K06141	2.67893e-07	8.86019e-07	0	0.000604137	0.00271745	MET
K06143	3.14969e-05	9.85203e-06	1.63927e-05	0.0198908	0.031213	MC
K05350	2.6673e-05	2.21533e-05	6.54897e-05	0.000905068	0.00338675	NC
K09469	3.04338e-07	1.58104e-05	0	9.47792e-05	0.00249255	MET
K20627	0	0	1.59951e-06	3.69998e-05	0.00249255	NC
K20626	0	0	3.99889e-07	0.000572748	0.00267644	NC
K03688	4.57018e-06	1.20436e-05	3.44677e-06	0.000865243	0.00327978	MET
K18941	0	0	6.58884e-07	0.00261034	0.00648922	NC
K01087	1.29207e-07	4.6962e-07	0	0.00192429	0.00531743	MET
K19294	9.36819e-05	0.000104343	0.000147904	0.0208584	0.0325455	NC
K03683	1.19369e-07	8.43021e-07	0	0.0027846	0.00671381	MET
K03684	5.63823e-06	1.63159e-05	5.44177e-07	0.00013776	0.00249255	MET
K02560	1.59389e-07	7.0179e-07	0	0.00682987	0.0129341	MET
K07300	5.49528e-08	8.01165e-07	0	0.00682987	0.0129341	MET
K03112	3.17079e-07	1.41551e-06	0	0.000774137	0.00309054	MET
K03113	0.000168895	0.000111213	4.06724e-05	0.000224306	0.00249255	MC
K07304	6.43107e-06	6.19226e-05	4.61437e-06	0.000243596	0.00249255	MET
K07307	1.10104e-05	3.75728e-06	1.89922e-07	0.000416536	0.00249255	MC
K07306	5.62785e-06	8.86171e-06	1.13511e-06	0.000393669	0.00249255	MET
K07309	8.00172e-08	5.54842e-07	0	0.00748669	0.0138762	MET
K07308	8.23138e-08	1.08724e-06	0	0.0020938	0.0056462	MET
K07301	0.00027655	0.000275502	0.000343486	0.0271196	0.0406576	NC
K20757	4.04928e-06	1.79802e-06	1.09356e-06	0.0179081	0.028543	MC
K14665	3.80419e-07	9.05401e-07	0	0.000586868	0.00267644	MET
K03111	0.00047	0.00039102	0.000344304	0.00632972	0.0121997	MC
K16092	4.41001e-07	1.78964e-06	4.51716e-06	0.00871683	0.0155908	NC
K16091	0	1.19352e-05	0	0.000257665	0.00249255	MET
K16090	7.7879e-08	5.80527e-07	0	0.0106983	0.0184426	MET
K12556	1.51519e-06	1.31224e-06	0	0.000381674	0.00249255	MC
K07348	2.96627e-07	1.38612e-06	0	0.00378828	0.00831356	MET
K16651	5.191e-07	9.20801e-07	0	0.00230324	0.00599896	MET
K11606	9.26127e-08	1.62297e-07	0	0.00626466	0.0121133	MET
K11605	1.61515e-07	2.50471e-07	0	0.00995675	0.0173848	MET
K11604	3.43694e-08	5.89628e-07	0	0.0013057	0.0042286	MET
K16077	1.10856e-07	6.35639e-07	0	0.00288128	0.00688971	MET
K16076	3.57611e-07	1.96305e-06	0	0.000252336	0.00249255	MET
K10550	2.4413e-06	3.52389e-06	0	0.000410278	0.00249255	MET
K10551	2.54117e-06	3.14308e-06	0	0.000341727	0.00249255	MET
K03117	3.01805e-06	1.10043e-05	4.22401e-06	0.0307305	0.0456704	MET
K02418	1.18443e-06	2.39768e-06	0	0.000222711	0.00249255	MET
K03119	1.35001e-07	1.21125e-06	0	0.00108588	0.0037329	MET
K12059	1.70322e-07	2.258e-06	0	0.00361636	0.00808444	MET
K06891	1.45029e-05	6.05484e-05	1.42752e-05	0.0189207	0.0299321	MET
K20461	3.33001e-05	1.78645e-05	5.15364e-05	0.00385841	0.00843971	NC
K06894	1.95425e-05	5.51713e-05	2.86833e-05	0.00105154	0.00367808	MET
K06895	4.99027e-06	1.44675e-05	3.65713e-06	0.00900478	0.0160383	MET
K06899	2.84662e-07	7.96964e-07	0	0.000604137	0.00271745	MET
K19776	0	1.38185e-06	0	0.00510547	0.010398	MET
K07232	3.23529e-07	9.09335e-07	0	0.00571465	0.0113371	MET
K09684	3.45963e-08	1.14989e-06	2.17743e-07	0.0103607	0.0180001	MET
K09680	4.63943e-05	7.0019e-05	3.36017e-06	0.000205513	0.00249255	MET
K02466	0	3.39437e-07	0	0.0107386	0.0184904	MET
K09688	2.54783e-07	1.0599e-06	1.88911e-06	0.00975476	0.0170873	NC
K09689	0	3.40693e-07	2.17546e-06	0.000318293	0.00249255	NC
K07078	0.000186264	0.00019663	4.42229e-05	0.000460821	0.00249255	MET
K11391	3.76583e-07	1.45647e-06	0	0.000586868	0.00267644	MET
K11392	2.00095e-07	1.96634e-05	4.38381e-06	0.000262283	0.00249255	MET
K20340	4.24667e-07	1.00682e-06	0	0.000446075	0.00249255	MET
K05967	4.89504e-07	1.51249e-06	0	0.00024907	0.00249255	MET
K20344	2.54615e-05	2.81382e-06	2.4836e-06	0.000932632	0.00342944	MC
K20345	4.21257e-05	7.1349e-06	9.74972e-07	0.000205513	0.00249255	MC
K10017	0	1.12911e-06	0	0.000771858	0.00309054	MET
K03562	4.24669e-06	1.52264e-05	9.19308e-07	0.000367973	0.00249255	MET
K19709	3.64257e-06	6.73693e-06	0	0.000405489	0.00249255	MET
K08641	0.000166633	0.000144478	4.32926e-05	0.000302781	0.00249255	MC
K00658	4.56681e-05	6.70711e-05	9.5382e-07	0.000393669	0.00249255	MET
K00656	0.000217914	0.000307766	9.33716e-05	0.000189239	0.00249255	MET
K00657	7.68485e-05	0.000121574	7.79822e-05	0.00182258	0.00515534	MET
K00655	0.000224766	0.0002255	0.00027577	0.000741007	0.00303697	NC
K00302	0	0	1.94375e-07	0.00301887	0.0071564	NC
K00651	0.000218253	0.000210699	0.000115016	0.000408712	0.00249255	MC
K06436	8.90542e-07	1.42133e-06	0	0.00230324	0.00599896	MET
K07121	2.18317e-07	8.13438e-07	0	0.00213759	0.00572393	MET
K07120	1.0395e-07	6.71242e-06	0	9.36503e-05	0.00249255	MET
K10824	4.40639e-08	1.30986e-06	0	0.0045689	0.00958727	MET
K07127	7.71484e-08	1.05416e-06	0	0.00394637	0.00861596	MET
K07126	2.38356e-05	8.42263e-05	7.97885e-05	0.000887147	0.00333842	MET
K07339	0	0	2.63262e-07	0.01054	0.0182182	NC
K16074	2.08185e-07	8.11862e-07	0	0.00152476	0.00461479	MET
K04062	0	4.98597e-07	0	0.0157072	0.025594	MET
K09920	0	1.07309e-06	0	0.000925166	0.00342665	MET
K01873	0.000279005	0.000285826	0.000313638	0.0107538	0.0184904	NC
K01872	0.000377365	0.00036557	0.000327878	0.00171216	0.0049695	MC
K01875	0.000223831	0.000263973	0.000166351	6.65538e-05	0.00249255	MET
K01874	0.000297204	0.000348357	0.000230552	0.00323897	0.00749576	MET
K01876	0.000338346	0.000276499	0.000337714	0.00328792	0.00755639	MC
K01879	8.71647e-06	3.04813e-05	8.58682e-06	0.0189207	0.0299321	MET
K04020	1.74951e-07	8.4263e-07	0	0.00139134	0.00439321	MET
K04022	3.62113e-07	1.28458e-06	0	0.00100711	0.00357929	MET
K04027	2.31663e-06	4.6856e-06	4.52144e-07	0.00242853	0.00620937	MET
K06320	5.84449e-07	1.02997e-07	1.28411e-05	0.000107729	0.00249255	NC
K04029	1.61364e-05	2.07681e-05	1.13863e-05	0.0241735	0.0369284	MET
K04028	8.40857e-06	9.71906e-06	3.50584e-06	0.00391672	0.00855924	MET
K09160	4.61934e-07	3.40911e-06	0	6.78591e-05	0.00249255	MET
K03227	5.13511e-07	0	0	0.00594438	0.0116935	MC
K00018	0.000162924	0.00016387	9.00396e-05	0.00262546	0.00651136	MET
K07054	8.22361e-05	4.0135e-05	0.000179054	0.000104377	0.00249255	NC
K07053	5.78429e-05	5.51605e-05	0.000101872	0.0132667	0.0220012	NC
K07052	0.000223498	0.000176135	8.34582e-05	0.000224306	0.00249255	MC
K00010	3.12425e-05	1.77712e-05	4.52796e-05	0.00100026	0.00357929	NC
K00014	0.000250934	0.000206732	0.000178149	0.000382034	0.00249255	MC
K00016	4.53579e-05	7.51699e-05	3.7286e-05	0.00204983	0.005572	MET
K01355	5.14545e-08	4.35859e-07	0	0.00865521	0.0155222	MET
K01523	6.86211e-06	8.87912e-06	3.57975e-06	0.0270518	0.0406343	MET
K10040	3.02445e-07	4.22828e-07	7.15503e-06	0.00091676	0.00342228	NC
K10041	0	0	8.22556e-06	0.000250922	0.00249255	NC
K00633	3.38372e-05	8.33479e-05	1.64899e-05	0.00187809	0.00526876	MET
K00275	2.34618e-05	4.00324e-05	2.23126e-07	0.000321184	0.00249255	MET
K16929	3.33816e-06	0	0	1.839e-05	0.00249255	MC
K19174	0	1.30891e-07	6.18356e-08	0.0133603	0.0221407	MET
K07340	2.63501e-07	1.00506e-06	0	0.000567086	0.00267644	MET
K00278	0.000243747	0.000237204	0.000174265	0.00621991	0.0120878	MC
K19170	6.64482e-06	2.40818e-05	1.32295e-05	0.00239949	0.0061807	MET
K19173	0	1.95809e-07	0	0.0317209	0.0468935	MET
K19172	2.12169e-06	9.43755e-06	4.68382e-06	0.00239949	0.0061807	MET
K01308	2.58672e-06	2.30429e-06	1.40832e-05	0.00141943	0.00445779	NC
K01305	3.7487e-05	1.88081e-05	3.41245e-06	0.000302781	0.00249255	MC
K01304	2.56844e-05	1.93123e-05	9.91163e-06	0.00180445	0.00512534	MC
K04775	8.65196e-08	9.97995e-07	0	0.000652608	0.00283916	MET
K04774	1.61233e-07	7.91141e-07	0	0.00165299	0.00486419	MET
K05851	1.11875e-06	3.42969e-06	0	0.000808057	0.00317378	MET
K04773	0.00026708	0.000226925	0.000137627	0.000970693	0.00350591	MC
K04772	2.29936e-07	1.03294e-06	0	0.000200067	0.00249255	MET
K02650	0	0	2.30206e-06	3.69998e-05	0.00249255	NC
K02651	0	1.37264e-05	0	0.000572748	0.00267644	MET
K02653	1.33285e-05	3.46148e-05	4.08739e-05	0.0057417	0.0113618	NC
K18765	1.7755e-07	9.82887e-07	0	0.000177706	0.00249255	MET
K00879	5.0881e-06	5.66763e-06	3.2436e-07	0.00515649	0.0104156	MET
K13638	3.09571e-07	9.94141e-07	0	0.00541292	0.0108444	MET
K13639	3.96481e-07	1.63649e-06	0	0.000329583	0.00249255	MET
K13634	2.18886e-07	1.07455e-06	0	0.000287285	0.00249255	MET
K00873	0.000272656	0.000284467	0.000240604	0.00739094	0.0137677	MET
K13637	4.46921e-07	1.95598e-06	0	0.000671045	0.00286976	MET
K00876	0.000498882	0.00040237	0.000512365	0.0110813	0.018935	NC
K13631	2.3192e-07	4.90873e-07	0	0.00571465	0.0113371	MET
K00874	0.000128213	0.000165655	0.000214184	0.00114483	0.00385462	NC
K00673	2.0001e-07	8.11257e-07	0	0.0168495	0.0270682	MET
K04486	0.000125165	0.000133243	7.25409e-05	0.0259262	0.039183	MET
K04485	0.000299313	0.000250418	0.000277659	0.0165313	0.0266303	MC
K08277	1.62966e-07	1.4762e-06	0	0.00686885	0.0129816	MET
K02315	0.000131074	9.83805e-05	0.00024432	0.00590179	0.0116584	NC
K06410	1.87633e-05	1.81373e-05	7.89632e-06	0.00238156	0.00615829	MC
K01277	0.00023897	0.000182082	0.000204495	0.0162445	0.0262135	MC
K15520	1.83511e-07	4.97927e-07	0	0.0130466	0.0218065	MET
K05778	5.35845e-08	5.24014e-07	0	0.00318278	0.0073985	MET
K01270	0.000368458	0.000302141	0.000355222	0.0270518	0.0406343	MC
K08173	1.18395e-07	5.79732e-07	0	0.00395121	0.00862251	MET
K05774	4.07339e-07	1.57638e-06	0	0.00216944	0.00575641	MET
K05772	1.93473e-06	1.7372e-05	4.70224e-06	0.00555809	0.0110972	MET
K05770	5.37506e-06	4.10864e-05	1.76686e-05	0.000460821	0.00249255	MET
K01278	0.000476146	0.000391156	0.000237923	0.000511839	0.00261594	MC
K15924	0	0	3.82565e-06	5.6944e-05	0.00249255	NC
K16371	5.6765e-06	1.17579e-05	2.15275e-06	0.0104359	0.0181174	MET
K15922	2.51435e-06	5.29497e-06	0	0.000348753	0.00249255	MET
K15921	1.93093e-05	1.30475e-05	2.98547e-05	0.00471267	0.00978576	NC
K01696	0.000187992	0.000154602	0.000153239	0.023459	0.0359192	MC
K01692	0	1.01529e-05	0	0.00187548	0.00526876	MET
K00906	2.68411e-07	1.64707e-06	0	0.000852232	0.00326491	MET
K17828	0.000280176	0.000245792	0.000286938	0.00513077	0.0104132	NC
K00901	5.52293e-05	7.92262e-05	1.41146e-05	0.000272601	0.00249255	MET
K01451	1.29616e-05	2.30221e-05	3.36664e-06	9.68352e-05	0.00249255	MET
K19046	0	1.09345e-06	0	0.0220835	0.034183	MET
K00298	3.97238e-06	2.91313e-06	0	0.000334022	0.00249255	MC
K03560	1.1949e-06	1.87519e-05	3.96065e-06	0.00385841	0.00843971	MET
K04568	5.88011e-07	1.38083e-06	0	0.000928937	0.00342665	MET
K07034	2.60912e-07	7.74607e-07	0	0.00567978	0.0112871	MET
K01051	4.7635e-05	7.61345e-05	0.000122078	0.00206526	0.00559116	NC
K01057	7.88916e-05	0.000108878	1.06748e-05	0.000187356	0.00249255	MET
K01056	0.000363871	0.000332355	0.000299598	0.00471267	0.00978576	MC
K02116	9.44001e-07	2.30772e-06	3.14405e-07	0.0183256	0.0291785	MET
K17195	3.36976e-06	1.08925e-05	0	0.000226451	0.00249255	MET
K01058	0.000113924	6.82529e-05	0.000228447	0.000252904	0.00249255	NC
K05516	7.37911e-05	0.000110217	2.07745e-05	0.000169951	0.00249255	MET
K05517	3.92713e-07	2.12783e-06	0	0.000347793	0.00249255	MET
K05515	0.000200158	0.000245061	0.000113284	0.000147379	0.00249255	MET
K02500	0.000226483	0.000192765	0.000158865	0.000802724	0.00316348	MC
K02501	0.000219447	0.000197473	0.000158684	0.00171644	0.0049695	MC
K02504	3.02613e-07	8.77172e-07	0	0.000618666	0.00276145	MET
K02507	3.97785e-07	1.01559e-06	0	0.000343561	0.00249255	MET
K02508	1.3049e-07	9.01213e-07	0	0.00965273	0.0169276	MET
K20509	1.57326e-06	1.61659e-06	3.11824e-08	0.00247957	0.00626262	MET
K01821	1.40537e-06	3.29508e-06	3.24648e-06	0.0249097	0.0378276	MET
K11477	4.30653e-07	1.15999e-06	0	0.00626466	0.0121133	MET
K12945	0	1.21096e-06	0	0.0185548	0.029433	MET
K12944	4.80878e-07	1.18277e-06	0	0.00129767	0.00421425	MET
K12941	2.63097e-05	2.37413e-05	7.7942e-06	0.00333761	0.00760482	MC
K12940	2.24203e-05	5.20153e-05	8.24714e-06	0.00133677	0.00427583	MET
K12943	1.1387e-07	1.59513e-06	0	0.0004898	0.00255571	MET
K12942	3.84558e-05	9.08844e-05	2.14075e-06	0.000123102	0.00249255	MET
K02434	3.87446e-05	8.52845e-05	7.37751e-05	0.00430706	0.00916081	MET
K02386	1.38179e-06	1.41342e-06	0	0.000506509	0.00261594	MET
K03438	0.000381026	0.000347511	0.00034598	0.00884856	0.0157901	MC
K03929	0.000105257	3.61948e-05	9.82043e-05	0.000865243	0.00327978	MC
K13381	1.21547e-07	1.59756e-06	0	0.00300399	0.00712475	MET
K05352	1.71709e-05	9.68834e-06	2.60646e-06	0.0145161	0.0238865	MC
K02433	3.71586e-05	5.68331e-05	7.83457e-05	0.00231117	0.00600288	NC
K03925	0.000123245	0.000145115	5.70521e-05	0.000802724	0.00316348	MET
K03924	0.00041442	0.000306463	0.000348748	0.00100026	0.00357929	MC
K03430	4.12877e-05	8.56505e-05	7.2602e-06	0.00013673	0.00249255	MET
K02438	3.89221e-07	9.97369e-07	0	0.00112288	0.00380719	MET
K03436	5.75269e-05	4.24496e-05	2.32937e-05	0.00784797	0.0143332	MC
K03435	4.84878e-07	1.02672e-06	0	0.00155731	0.00466495	MET
K02763	1.05613e-06	7.19029e-08	0	0.0301213	0.0448696	MC
K03212	1.74667e-07	5.77011e-07	0	0.000517078	0.00261594	MET
K06133	4.80253e-07	6.25424e-06	6.10076e-07	0.000557248	0.00267644	MET
K03210	0.000178708	0.0001821	0.000121819	0.00309645	0.00728484	MET
K03217	0.000238019	0.000273718	0.000309618	0.00261236	0.00648922	NC
K03740	9.20696e-07	4.28127e-06	9.78814e-07	0.00506806	0.0103806	MET
K03742	0.000144277	0.000161503	0.000207215	0.00411754	0.00886124	NC
K13892	3.75435e-06	1.91346e-06	1.39996e-07	0.00224253	0.00589712	MC
K13893	2.67027e-06	1.25516e-05	2.20331e-06	0.00344787	0.00779358	MET
K13894	2.77676e-06	1.20155e-05	2.04068e-06	0.00513077	0.0104132	MET
K13895	2.64233e-06	1.26117e-05	1.91766e-06	0.0057417	0.0113618	MET
K13896	1.96273e-07	1.11684e-05	1.58609e-06	0.00092798	0.00342665	MET
K09908	6.08516e-07	1.37755e-06	0	0.000426826	0.00249255	MET
K02348	5.91648e-06	1.23868e-05	6.21594e-06	0.00464251	0.00967017	MET
K03707	3.58018e-06	5.76375e-06	7.28921e-06	0.032468	0.0478767	NC
K02342	0.000509917	0.000399039	0.000415638	0.0156466	0.0255221	MC
K02343	0.000248111	0.000276249	0.00018667	0.000123102	0.00249255	MET
K06151	9.68677e-07	0	2.21559e-08	0.00049702	0.00258472	MC
K02341	0.000262785	0.000235343	0.000191208	0.000568505	0.00267644	MC
K02346	0.000268737	0.00025236	0.00012561	0.000377289	0.00249255	MC
K06156	1.86169e-06	5.83544e-06	6.72709e-06	0.0271196	0.0406576	NC
K06155	3.12115e-07	1.15018e-06	0	0.000311616	0.00249255	MET
K17398	2.70296e-06	5.176e-06	1.63479e-05	0.0187324	0.0296745	NC
K03696	0.000274657	0.00023703	0.000298405	0.0184997	0.0294056	NC
K03693	2.19513e-06	1.75457e-06	0	0.000775906	0.00309054	MC
K16868	1.71614e-07	1.13187e-06	3.87827e-06	0.0129678	0.0217138	NC
K03690	3.80635e-07	1.26173e-06	0	0.0168495	0.0270682	MET
K09475	1.011e-07	1.51763e-06	0	0.00127302	0.00415444	MET
K09474	7.14403e-06	5.51677e-05	2.08907e-05	0.000622044	0.00276398	MET
K09477	3.79244e-07	5.02005e-07	0	0.00152476	0.00461479	MET
K09476	3.04748e-07	1.62068e-06	0	0.000411053	0.00249255	MET
K16710	5.88196e-07	2.73483e-06	1.90802e-05	0.00102814	0.00363195	NC
K09470	1.09772e-07	7.51848e-07	0	0.00748669	0.0138762	MET
K03327	0.000534644	0.000438675	0.000380699	0.00867335	0.0155428	MC
K03326	6.77282e-05	3.98194e-05	1.31353e-05	0.00309645	0.00728484	MC
K03324	0.000346016	0.000318649	0.000376354	0.0271196	0.0406576	NC
K03322	0.000140261	0.000138105	1.62733e-05	0.000422213	0.00249255	MC
K03320	5.71015e-05	9.16853e-05	0.000187756	0.000283018	0.00249255	NC
K19048	3.25185e-06	7.37983e-06	1.47665e-05	0.00054349	0.00266327	NC
K03329	2.32297e-07	8.79984e-07	0	0.00221474	0.00585666	MET
K03328	2.8581e-05	4.15864e-05	7.33719e-06	0.000322309	0.00249255	MET
K03810	1.91274e-06	2.27624e-06	0	0.000304067	0.00249255	MET
K11895	2.29427e-07	7.74015e-06	1.60134e-06	0.00369883	0.00820486	MET
K19577	1.33422e-07	5.19309e-07	0	0.000928937	0.00342665	MET
K07334	6.17465e-05	2.81504e-05	5.49683e-05	0.004905	0.0100954	MC
K03106	0.000255533	0.00022511	0.000265617	0.032468	0.0478767	NC
K07336	2.00404e-07	9.1634e-07	0	0.00216944	0.00575641	MET
K07337	5.94616e-07	6.81814e-06	6.61983e-06	0.000555435	0.00267644	MET
K03101	0.000189151	0.000202641	0.000276603	0.00115923	0.00388764	NC
K03100	0.00059838	0.000598599	0.000360056	0.000443861	0.00249255	MET
K07100	0	0	3.36036e-06	3.69998e-05	0.00249255	NC
K12541	1.56225e-06	6.95396e-07	2.86925e-07	0.0195946	0.0308416	MC
K04757	1.02664e-07	3.92393e-07	0	0.00771256	0.014119	MET
K12543	0	6.87282e-07	0	0.00218801	0.00579581	MET
K12542	1.19376e-06	7.44423e-07	3.73761e-07	0.0326308	0.048056	MC
K17242	9.18812e-07	1.4669e-06	5.8548e-06	0.0135686	0.0224382	NC
K11940	0	5.2796e-07	0	0.00110184	0.00376966	MET
K09969	1.41579e-07	3.65859e-06	6.9212e-07	0.00100325	0.00357929	MET
K13695	0	7.21286e-07	0	0.0169824	0.0272442	MET
K11014	0	2.60967e-07	0	0.00937793	0.0165389	MET
K07107	0.000345622	0.000348216	0.000216737	0.00209647	0.0056462	MET
K06881	0.000251705	0.000218257	0.000229478	0.0161231	0.0260898	MC
K06880	5.71251e-08	8.13442e-08	7.8674e-06	0.000372707	0.00249255	NC
K06885	7.62036e-05	0.000116572	1.61161e-05	0.000263225	0.00249255	MET
K06884	0	0	3.39657e-06	1.839e-05	0.00249255	NC
K06887	1.44163e-07	1.88519e-06	0	0.000305295	0.00249255	MET
K10941	7.3899e-07	0	2.1794e-08	0.0046186	0.00965049	MC
K09858	1.79044e-06	1.85634e-05	5.99184e-06	0.000519575	0.00262032	MET
K09695	0	0	4.25242e-07	0.00405161	0.00880204	NC
K09697	1.43029e-05	1.16463e-05	3.75752e-05	0.00359756	0.00807721	NC
K09696	2.37794e-06	1.72533e-06	2.19169e-05	0.000393669	0.00249255	NC
K09691	6.28935e-06	1.37718e-05	4.51563e-06	0.0224268	0.0345539	MET
K09961	2.50752e-06	4.67948e-06	1.54345e-06	0.0270518	0.0406343	MET
K09693	1.47653e-05	2.15219e-05	4.99513e-05	0.0047839	0.00989845	NC
K09692	3.60697e-05	2.17892e-05	7.2612e-05	0.00294543	0.00702152	NC
K11708	0	0	5.94043e-07	0.000110201	0.00249255	NC
K11073	4.73111e-07	1.42746e-06	0	0.00165299	0.00486419	MET
K09698	2.67759e-06	3.81643e-06	2.08816e-07	0.000591706	0.00269587	MET
K02113	6.68075e-05	0.000105857	1.94691e-05	0.000153394	0.00249255	MET
K07591	0	8.10804e-07	0	0.00405161	0.00880204	MET
K07592	2.02675e-07	1.08896e-06	0	0.00129767	0.00421425	MET
K06934	1.24936e-06	5.46418e-06	6.0905e-07	0.00119453	0.0039648	MET
K21029	0.000169808	0.00012107	7.05559e-05	0.000183646	0.00249255	MC
K00483	0	8.64967e-07	0	0.00813569	0.0147148	MET
K11250	0	1.15852e-06	0	0.00225025	0.00589712	MET
K00484	9.63443e-08	6.57663e-07	0	0.0128981	0.021628	MET
K07115	1.00288e-06	5.58157e-06	0	8.75107e-05	0.00249255	MET
K00318	2.40418e-05	2.30915e-05	3.19912e-06	0.000457378	0.00249255	MC
K07112	1.42425e-05	3.16386e-05	1.05004e-05	0.0134672	0.0222783	MET
K10830	9.6917e-07	7.30407e-07	0	0.00247733	0.00626036	MC
K00313	6.94901e-07	2.74433e-06	0	0.000517078	0.00261594	MET
K08679	2.60998e-05	4.74696e-05	6.4241e-05	0.00539383	0.0108201	NC
K00641	4.8038e-05	3.73297e-05	9.94472e-05	0.00171644	0.0049695	NC
K07119	4.36999e-08	7.2372e-07	0	0.0106983	0.0184426	MET
K10547	1.3809e-05	1.96483e-05	3.65021e-05	0.0107538	0.0184904	NC
K10546	1.50285e-05	2.09746e-05	3.01045e-05	0.0224268	0.0345539	NC
K10545	5.84638e-06	2.07915e-06	9.82121e-07	0.0161231	0.0260898	MC
K10543	6.34314e-06	8.31775e-06	1.58667e-05	0.0120644	0.0203542	NC
K02812	5.11081e-07	1.34611e-06	0	0.0189679	0.0299865	MET
K07688	1.68529e-07	1.03665e-06	0	0.0230395	0.0353929	MET
K07689	6.04731e-08	7.7032e-07	0	0.00525677	0.0105862	MET
K10549	2.24941e-06	3.12226e-06	0	0.000380426	0.00249255	MET
K10548	1.23024e-05	2.13578e-05	2.95918e-05	0.0132667	0.0220012	NC
K03405	7.67961e-07	2.3129e-07	0	0.000755977	0.00307191	MC
K06218	8.83025e-07	9.1883e-07	6.40841e-06	0.0183061	0.0291575	NC
K03973	4.12685e-07	1.50289e-06	0	0.00112504	0.00380719	MET
K01848	4.8394e-07	2.78561e-06	2.71442e-07	0.000693914	0.00294331	MET
K01849	6.19366e-07	3.85751e-06	2.56455e-07	0.00936652	0.0165389	MET
K02451	2.24553e-07	7.24904e-07	0	0.00626134	0.0121133	MET
K01844	6.09684e-06	9.16415e-06	1.13757e-06	8.52434e-05	0.00249255	MET
K14983	2.47837e-06	7.53699e-07	2.91524e-06	0.030273	0.0450525	NC
K01843	1.84005e-05	7.41122e-05	1.16281e-06	5.64305e-05	0.00249255	MET
K00005	1.43261e-05	1.59076e-05	4.72198e-06	0.0156466	0.0255221	MET
K00003	9.50236e-05	0.000109997	0.000133919	0.0171201	0.0274369	NC
K04019	7.06815e-06	8.71117e-06	2.11043e-06	0.00261236	0.00648922	MET
K00001	5.81326e-06	5.0625e-05	4.5548e-06	0.00411754	0.00886124	MET
K04014	4.63601e-06	5.11094e-06	1.1802e-06	0.00752142	0.0138944	MET
K02548	0.000270782	0.000222598	0.000205053	0.0043831	0.00929567	MC
K04016	4.31189e-07	1.4152e-06	0	0.000247351	0.00249255	MET
K18531	1.14615e-07	1.17919e-06	0	0.00965273	0.0169276	MET
K00009	1.25491e-05	1.80808e-05	5.50558e-06	0.00133677	0.00427583	MET
K02469	0.000327827	0.000320342	0.000370697	0.0102806	0.0178809	NC
K18920	0	1.54728e-07	0	0.0311224	0.0460963	MET
K09902	9.61713e-08	6.31151e-07	0	0.0210728	0.0328362	MET
K01035	5.12832e-06	2.49174e-05	2.13309e-06	9.68352e-05	0.00249255	MET
K18816	8.07727e-07	1.76423e-06	2.32644e-05	0.000739157	0.00303697	NC
K15396	1.86108e-07	1.80693e-06	0	0.0018565	0.00523858	MET
K03146	2.09666e-05	2.26527e-05	1.74109e-06	0.000457378	0.00249255	MET
K00262	0.000417705	0.000349563	0.000466975	0.00428558	0.00913448	NC
K00260	6.09055e-07	1.73455e-06	4.15143e-08	0.0129678	0.0217138	MET
K00266	0.000375731	0.000332155	0.000470964	0.00023463	0.00249255	NC
K08484	2.14328e-07	6.8534e-06	8.16904e-08	0.00278445	0.00671381	MET
K17722	1.38342e-07	7.32445e-07	0	0.00100711	0.00357929	MET
K01998	4.572e-05	0.000112483	3.6141e-05	0.00411754	0.00886124	MET
K01999	4.11846e-05	0.000111589	3.27478e-05	0.00963358	0.0169276	MET
K18330	4.38017e-05	3.20806e-05	9.68687e-06	0.000302781	0.00249255	MC
K17723	8.39276e-06	6.00215e-06	1.48726e-07	0.000451291	0.00249255	MC
K01992	0.000919934	0.0008854	0.000757692	0.00141943	0.00445779	MC
K01993	0.000364578	0.000383574	0.000251268	0.011026	0.0188613	MET
K01991	0.000141079	0.000199071	8.18513e-05	0.00208601	0.00564081	MET
K01996	5.36576e-05	0.000121469	3.42489e-05	0.00385841	0.00843971	MET
K01997	5.71137e-05	0.000121127	3.2676e-05	0.00447164	0.00944058	MET
K01995	5.37912e-05	0.000116407	3.58051e-05	0.00655518	0.0125359	MET
K03828	4.02559e-07	4.07583e-06	0	0.000358764	0.00249255	MET
K04744	8.28383e-06	1.46013e-05	3.28076e-06	0.000873939	0.00330202	MET
K04748	6.12431e-07	3.46988e-06	2.74348e-06	0.00260193	0.00648922	MET
K04749	9.05192e-06	1.89681e-05	1.46763e-06	0.000444972	0.00249255	MET
K01512	6.85817e-06	9.22963e-06	1.27529e-05	0.0262523	0.039599	NC
K00868	0.000156624	0.000205162	7.78734e-05	0.000422213	0.00249255	MET
K18149	1.59911e-05	1.33119e-05	1.96613e-06	0.000393669	0.00249255	MC
K18148	2.98092e-06	6.7626e-06	0	0.000336398	0.00249255	MET
K03485	2.16091e-07	1.28748e-06	0	0.0045844	0.00958727	MET
K18142	3.32549e-07	2.00298e-06	0	0.000351393	0.00249255	MET
K13620	1.57359e-07	7.3779e-07	0	0.000200067	0.00249255	MET
K00865	9.89204e-05	0.000122582	4.14742e-05	0.000283018	0.00249255	MET
K00864	0.000117597	0.000134213	0.000173426	0.00489275	0.010079	NC
K07686	7.75183e-08	6.94234e-07	0	0.0230395	0.0353929	MET
K01192	6.76151e-05	9.51621e-05	0.000110753	0.00997673	0.0173848	NC
K01190	0.00158978	0.00138281	0.00121736	0.00767337	0.0141081	MC
K01197	0.000258824	0.000157987	6.56971e-05	4.90584e-05	0.00249255	MC
K01194	9.59442e-07	9.12052e-06	4.63022e-07	0.00013776	0.00249255	MET
K01198	8.7302e-05	0.000121673	0.000211796	0.000577097	0.00267644	NC
K02317	2.47626e-07	5.00369e-07	0	0.000814641	0.00318357	MET
K01200	0.000133205	0.000100055	0.000163418	0.000970693	0.00350591	NC
K01201	0.000100126	7.22757e-05	7.1225e-05	0.0105408	0.0182182	MC
K01205	0.000396123	0.000312464	9.00104e-05	0.000322309	0.00249255	MC
K21021	2.95334e-07	9.53458e-07	0	0.000343561	0.00249255	MET
K01208	1.35261e-05	4.86986e-06	3.25351e-05	0.000272601	0.00249255	NC
K01209	7.03246e-05	0.000110138	0.00018376	0.000205513	0.00249255	NC
K07687	5.30685e-07	1.53498e-06	0	0.00411528	0.00886124	MET
K20429	1.5354e-06	1.13843e-06	3.93756e-05	0.000422213	0.00249255	NC
K06164	2.277e-06	7.96739e-06	0	0.000148961	0.00249255	MET
K01428	3.64892e-05	2.94397e-05	0.000103198	0.000322309	0.00249255	NC
K01429	3.78846e-05	3.18295e-05	0.000101515	0.000422213	0.00249255	NC
K07351	3.11183e-07	1.75685e-06	0	0.00326296	0.00752982	MET
K01560	5.94733e-06	1.61757e-05	3.60142e-06	0.0048562	0.010017	MET
K01420	4.20152e-05	6.69669e-05	2.83629e-05	0.00706572	0.013241	MET
K01426	8.95214e-06	7.84353e-06	1.2339e-06	0.000341385	0.00249255	MC
K01424	0.00038072	0.000392083	0.000297819	0.000582897	0.00267644	MET
K01425	0.000142963	0.000215952	0.00011574	0.000326363	0.00249255	MET
K02647	7.88887e-05	5.18664e-05	0.000118398	0.0270518	0.0406343	NC
K08068	0	5.93977e-07	2.21095e-06	0.000517586	0.00261594	NC
K14287	4.96764e-07	1.62819e-06	0	0.000281155	0.00249255	MET
K05501	2.478e-07	1.20095e-06	0	0.00458629	0.00958727	MET
K14534	8.5565e-06	1.38223e-05	4.60949e-06	0.00294543	0.00702152	MET
K19810	3.58721e-07	1.057e-06	0	0.00108588	0.0037329	MET
K03594	6.02128e-05	0.000136086	2.90877e-05	0.000161259	0.00249255	MET
K03595	0.000256675	0.00022772	0.000286396	0.00119453	0.0039648	NC
K03590	0.000201383	0.000206432	6.06584e-05	0.000461975	0.00249255	MET
K03591	2.49606e-07	2.18231e-06	0	0.000463843	0.00249556	MET
K02519	0.000329097	0.000320823	0.000295928	0.0179081	0.028543	MC
K02517	0.000198783	0.000208374	8.92577e-05	0.000582897	0.00267644	MET
K03919	2.22907e-07	4.94864e-07	0	0.00300399	0.00712475	MET
K03598	2.53719e-07	1.27419e-06	0	0.00121621	0.00401107	MET
K03599	3.32783e-06	3.92133e-06	8.97714e-07	0.00180445	0.00512534	MET
K02511	1.45419e-07	8.97374e-07	0	0.00300399	0.00712475	MET
K02510	3.90742e-06	6.41953e-06	7.0037e-07	0.00175112	0.0050511	MET
K01736	0.00034183	0.000246208	0.000273062	0.0113618	0.0193366	MC
K01734	0.000264065	0.000150514	0.000177135	0.00701293	0.0131952	MC
K01735	0.000323545	0.000275872	0.000299394	0.00918669	0.0162877	MC
K01733	0.000183736	0.000224214	0.000190207	0.0334568	0.0491486	MET
K01730	2.08473e-06	4.19499e-05	2.5829e-08	0.000115132	0.00249255	MET
K01739	3.90824e-06	3.90515e-06	1.28004e-05	0.0015531	0.00466048	NC
K08311	9.14939e-06	5.2246e-06	2.25797e-06	0.00564209	0.0112265	MC
K02461	6.35871e-07	2.13369e-06	0	0.000181876	0.00249255	MET
K13409	9.26463e-08	4.2264e-07	0	0.00145456	0.00452199	MET
K13408	4.21958e-08	4.38263e-07	0	0.0027846	0.00671381	MET
K12974	1.45045e-07	7.24957e-07	0	0.00533721	0.0107388	MET
K12975	4.45326e-07	2.09198e-06	0	0.000192591	0.00249255	MET
K05343	6.45667e-07	2.07698e-06	1.88921e-05	0.000205513	0.00249255	NC
K05342	8.45195e-06	5.68908e-06	8.2475e-07	0.000359786	0.00249255	MC
K05340	4.82905e-05	7.04235e-05	2.52353e-05	0.000147379	0.00249255	MET
K02427	6.53209e-06	2.96315e-05	5.47313e-06	0.000918747	0.00342422	MET
K02425	2.03928e-07	5.12816e-07	0	0.00300399	0.00712475	MET
K05349	0.00120609	0.000711704	0.00100532	0.0018734	0.00526718	MC
K02428	0.000646928	0.000518986	0.000483686	0.00841702	0.0151591	MC
K08310	0	7.86116e-07	0	0.000432526	0.00249255	MET
K03770	7.06902e-05	0.000119505	3.31983e-05	0.000205	0.00249255	MET
K03771	0.000248842	0.000313915	0.000204594	0.00258637	0.00647285	MET
K03772	3.00185e-05	4.23837e-05	9.15953e-05	0.000474856	0.00253727	NC
K09726	0	0	3.10999e-06	7.46796e-05	0.00249255	NC
K03774	7.86913e-08	8.98536e-07	0	0.0027846	0.00671381	MET
K03775	0.000194459	0.000186362	0.000114835	0.00750264	0.0138762	MC
K03776	3.33658e-06	7.26074e-06	7.8027e-07	0.00591656	0.0116584	MET
K03777	1.17681e-05	8.55665e-06	4.86295e-08	0.000437931	0.00249255	MC
K03778	8.21337e-05	0.000123051	6.86182e-05	0.00276698	0.00671381	MET
K18850	1.70823e-07	8.41294e-07	0	0.00181088	0.00512534	MET
K12372	3.28286e-07	2.41343e-06	1.24694e-07	0.00707953	0.0132457	MET
K12373	0.0013435	0.00114157	0.000372638	0.000341385	0.00249255	MC
K12370	3.91019e-06	2.55129e-06	0	0.000548795	0.00267644	MC
K18856	1.64916e-05	2.07996e-05	4.86723e-05	0.00105154	0.00367808	NC
K01430	2.16725e-05	2.43099e-05	7.65919e-05	0.000457378	0.00249255	NC
K20609	0	6.52697e-07	3.86617e-07	0.00373837	0.00822336	MET
K20608	8.78861e-06	4.6137e-06	1.27346e-06	0.00122171	0.0040264	MC
K02357	0.000360663	0.000327607	0.000307939	0.00841702	0.0151591	MC
K16703	1.4642e-07	1.64161e-06	0	0.000514573	0.00261594	MET
K16874	0	2.10959e-07	0	0.00492503	0.0101187	MET
K16704	4.36722e-07	1.42304e-06	0	0.000852232	0.00326491	MET
K13574	0	1.04009e-06	0	0.000432526	0.00249255	MET
K12112	4.06304e-07	1.00037e-06	0	0.000890357	0.00334242	MET
K13979	2.31704e-07	4.79217e-07	3.68544e-06	0.0053715	0.0107846	NC
K18889	5.19247e-06	7.19642e-06	3.99147e-05	0.000453961	0.00249255	NC
K12288	5.97172e-08	8.08395e-07	0	0.00361636	0.00808444	MET
K03179	1.04891e-05	3.25285e-05	2.31259e-05	0.00148848	0.00455219	MET
K09996	2.5429e-07	7.96212e-07	0	0.000831278	0.00323506	MET
K09997	0	6.92471e-07	0	0.000445085	0.00249255	MET
K09994	1.1362e-07	5.01248e-06	0	0.000771858	0.00309054	MET
K07322	0.000192157	0.000231379	0.000107395	0.000433985	0.00249255	MET
K07321	1.14853e-05	2.30745e-05	2.46899e-05	0.00515649	0.0104156	NC
K07320	5.024e-06	3.2116e-06	4.78473e-07	0.00327152	0.00752982	MC
K02301	1.90428e-07	6.69052e-07	0	0.00129767	0.00421425	MET
K04752	3.27281e-06	2.32856e-06	2.62629e-07	0.00357086	0.00804045	MC
K02553	8.4302e-07	2.7312e-06	0	0.000281155	0.00249255	MET
K12574	5.51256e-05	0.000111891	0.000100315	0.00092798	0.00342665	MET
K08163	1.02503e-07	1.17977e-06	0	0.00748669	0.0138762	MET
K13889	1.25482e-06	3.75098e-06	2.64918e-06	0.0245388	0.0373886	MET
K12573	0.000341038	0.00030953	0.000286196	0.0018734	0.00526718	MC
K02897	0.000175686	0.000204515	5.31277e-05	0.000283018	0.00249255	MET
K18702	1.32561e-06	3.42449e-06	6.5382e-08	0.000417456	0.00249255	MET
K18704	2.76223e-06	3.58887e-06	6.35466e-08	0.000507609	0.00261594	MET
K18707	0.000322959	0.000275454	0.000300039	0.00447164	0.00944058	MC
K08680	3.44182e-06	4.8826e-06	5.37398e-08	0.000419557	0.00249255	MET
K11004	0	6.6386e-06	5.37901e-06	0.00302182	0.00715977	MET
K16055	1.38205e-05	4.63584e-05	6.99289e-07	7.46649e-05	0.00249255	MET
K13640	0	0	1.57794e-06	0.000257665	0.00249255	NC
K07217	0.000232396	0.000120732	4.76331e-05	0.000119762	0.00249255	MC
K07216	1.76994e-05	1.41634e-05	4.41418e-05	0.000997758	0.00357929	NC
K07214	0.000164481	5.57999e-05	0.000165305	0.00279479	0.00671381	NC
K01878	9.56365e-06	3.71655e-05	1.1324e-05	0.0194969	0.0306981	MET
K12152	3.67897e-07	1.22541e-06	0	0.0157329	0.0256205	MET
K07218	3.67225e-06	1.99823e-06	5.63397e-07	0.00276698	0.00671381	MC
K11901	1.36244e-07	4.44557e-06	1.54403e-06	0.00148728	0.00455219	MET
K15834	0	1.21785e-06	0	0.00701152	0.0131952	MET
K00303	4.212e-06	1.08015e-06	2.88584e-06	0.021764	0.0337667	MC
K15835	0	1.22703e-06	0	0.00701152	0.0131952	MET
K02986	0.00026264	0.000280211	0.000343325	0.000717312	0.00298029	NC
K06180	0.000891647	0.000780582	0.000581324	0.000326363	0.00249255	MC
K06181	3.36803e-06	4.42242e-06	7.77575e-08	0.000567086	0.00267644	MET
K06182	4.2467e-05	2.34595e-05	1.52215e-05	0.0145161	0.0238865	MC
K11717	0.000295644	0.000245103	0.000211366	0.00471267	0.00978576	MC
K06187	0.000373455	0.00033451	0.00032643	0.0255402	0.0386372	MC
K05916	4.0951e-06	2.51447e-06	4.73804e-07	0.00338805	0.00769188	MC
K08359	0	3.48414e-08	0	0.0311224	0.0460963	MET
K07589	2.37906e-07	8.44288e-07	0	0.00361636	0.00808444	MET
K02236	1.91794e-06	1.54412e-06	0	0.000372707	0.00249255	MC
K05711	1.31216e-07	7.7106e-07	0	0.0106983	0.0184426	MET
K11139	2.34004e-07	1.0048e-06	0	0.00444505	0.00939719	MET
K10985	1.39516e-06	9.63584e-06	5.58828e-06	0.00918669	0.0162877	MET
K04025	7.06808e-08	1.45497e-06	0	0.00601062	0.0117692	MET
K05988	3.46266e-05	6.42902e-06	2.07868e-05	0.000123102	0.00249255	MC
K03536	0.000146068	0.000190664	0.000115744	0.000779	0.00309054	MET
K05985	1.18877e-05	1.77955e-05	7.35975e-06	0.00231117	0.00600288	MET
K05984	1.54945e-07	8.01669e-07	0	0.00509792	0.010398	MET
K11752	0.000238972	0.000211258	0.000188401	0.0134672	0.0222783	MC
K00406	0	0	3.13037e-06	3.69998e-05	0.00249255	NC
K07102	6.77319e-06	4.11917e-06	7.33159e-07	0.00359756	0.00807721	MC
K07452	7.00127e-05	6.62013e-05	2.34051e-05	0.000585819	0.00267644	MC
K07106	0.000101249	0.000132161	2.55255e-05	0.000153394	0.00249255	MET
K07456	0.000301947	0.000245822	0.00028069	0.0114187	0.0194123	MC
K07109	8.25592e-06	2.32103e-05	3.8449e-05	0.000184567	0.00249255	NC
K00404	2.1437e-08	3.28549e-07	2.23428e-06	0.00223644	0.00589068	NC
K00675	1.05385e-07	9.69443e-07	0	0.000637142	0.00279911	MET
K06988	1.00227e-05	1.45877e-06	0	0.0014739	0.00454033	MC
K06989	6.28669e-06	5.03161e-05	1.98586e-05	0.000430743	0.00249255	MET
K16299	1.0028e-06	6.96776e-08	1.9091e-08	0.000479098	0.00254836	MC
K10537	1.97054e-06	2.13443e-06	1.4673e-07	0.00911804	0.0162276	MET
K06980	2.81154e-07	1.04773e-06	0	0.000552324	0.00267644	MET
K09893	3.71629e-07	1.31086e-06	0	0.0115851	0.0196484	MET
K10538	8.55022e-08	7.9669e-07	0	0.0004898	0.00255571	MET
K16291	2.94243e-07	1.0095e-06	0	0.00477392	0.00989534	MET
K06985	2.26178e-07	6.9367e-06	2.60881e-07	0.00145536	0.00452199	MET
K06987	9.99721e-06	8.7058e-06	3.48376e-05	0.0027326	0.00668479	NC
K03583	2.03002e-07	1.91826e-06	0	0.000747663	0.00304942	MET
K17898	1.6402e-06	4.59856e-06	0	0.000226451	0.00249255	MET
K17899	1.24186e-06	3.58001e-06	0	0.000397715	0.00249255	MET
K10190	3.74223e-06	5.26275e-06	2.17453e-05	0.000444972	0.00249255	NC
K10192	4.3044e-07	6.36911e-08	1.41751e-06	0.00914281	0.0162655	NC
K09912	1.31702e-07	1.16894e-06	0	0.016994	0.0272534	MET
K19779	0	3.89898e-07	0	0.00261034	0.00648922	MET
K01858	0.000126438	6.78075e-05	0.00012811	0.0289409	0.043194	NC
K15016	0	0	7.21498e-07	7.46796e-05	0.00249255	NC
K07113	5.70496e-07	8.79879e-07	0	0.00649809	0.0124573	MET
K02441	7.96678e-07	1.89305e-06	0	0.000446075	0.00249255	MET
K13630	0	3.3489e-07	0	0.0311224	0.0460963	MET
K00073	1.65295e-06	2.6406e-06	6.08624e-07	0.00752142	0.0138944	MET
K00076	6.09802e-05	3.9874e-05	6.32257e-05	0.0208584	0.0325455	NC
K00075	0.000252988	0.000255295	0.000158677	0.000460821	0.00249255	MET
K13933	0	2.01902e-06	6.48806e-07	0.000572071	0.00267644	MET
K02114	4.25389e-05	8.35887e-05	2.8371e-05	0.00701293	0.0131952	MET
K13932	0	1.66477e-06	6.34581e-07	0.000923776	0.00342665	MET
K07079	0.000241723	0.000248723	0.000378297	0.000460821	0.00249255	NC
K02291	1.06698e-06	6.30508e-07	4.04771e-08	0.0254274	0.0385038	MC
K07074	1.80216e-05	2.23124e-05	4.34028e-05	0.0334568	0.0491486	NC
K02119	1.43505e-05	2.16606e-05	4.0655e-06	0.000990303	0.0035657	MET
K07071	5.42232e-05	5.64363e-05	3.37369e-06	0.000460821	0.00249255	MET
K19157	2.79161e-05	2.39791e-05	7.51304e-05	0.000839671	0.00324877	NC
K19156	5.68362e-07	1.24921e-06	0	0.00444505	0.00939719	MET
K19155	2.51455e-06	1.33809e-06	0	0.00638317	0.0122672	MC
K08279	8.30585e-08	8.32692e-07	0	0.0015374	0.00463504	MET
K06603	2.22072e-05	1.12236e-05	4.69519e-05	0.00187809	0.00526876	NC
K08276	1.93161e-07	1.22948e-06	0	0.00022528	0.00249255	MET
K02565	4.04788e-08	8.08468e-07	0	0.00771256	0.014119	MET
K19159	1.77471e-05	1.36318e-05	4.33368e-06	0.000585819	0.00267644	MC
K19158	5.19666e-05	0.000290688	8.88847e-05	0.00266514	0.00659575	MET
K00299	0	1.12906e-06	0	0.0194346	0.030662	MET
K00294	2.45737e-05	2.51102e-05	3.53559e-06	0.000457378	0.00249255	MET
K15125	2.02188e-06	1.056e-05	1.28327e-07	0.000294568	0.00249255	MET
K21011	6.68434e-06	1.4345e-06	1.79617e-05	0.000504219	0.00261343	NC
K00290	0.000304825	0.000230694	0.000249283	0.0334568	0.0491486	MC
K21012	1.41855e-06	7.65384e-07	1.51041e-05	0.000865243	0.00327978	NC
K00455	0	9.9614e-07	0	0.00594438	0.0116935	MET
K00108	4.22493e-07	2.37235e-06	0	0.000376078	0.00249255	MET
K00459	3.91931e-06	0	2.79758e-06	0.000207642	0.00249255	MC
K00102	0	0	3.37197e-06	0.000946455	0.0034748	NC
K00100	4.24652e-06	1.06231e-05	1.03506e-07	0.000340202	0.00249255	MET
K00101	4.4077e-07	2.06474e-06	0	0.000376787	0.00249255	MET
K00854	0.000141375	0.000173047	0.000258791	0.00111656	0.00380719	NC
K00855	4.30055e-07	1.68884e-06	0	0.00122823	0.00404218	MET
K00857	0.000303427	0.00020388	0.000267518	0.00642538	0.0123331	MC
K00850	0.000487121	0.000448894	0.00040036	0.00278781	0.00671381	MC
K00851	2.14129e-06	2.48991e-06	2.30676e-07	0.00356246	0.00802542	MET
K01505	0	0	9.39404e-07	0.000527757	0.00263596	NC
K01507	4.38824e-05	3.68897e-05	6.73988e-05	0.0147354	0.0241624	NC
K04754	4.70741e-06	4.01844e-06	9.32309e-07	0.00333761	0.00760482	MC
K04753	2.44205e-07	1.03707e-06	0	0.0045844	0.00958727	MET
K00859	0.000116785	0.000146735	5.88896e-05	0.000123102	0.00249255	MET
K04751	1.32238e-05	5.00827e-05	7.79817e-06	0.000122488	0.00249255	MET
K04750	3.57787e-06	8.37351e-06	1.44492e-05	0.00101537	0.0036023	NC
K11689	0	0	3.37057e-06	8.94107e-05	0.00249255	NC
K20447	8.09283e-07	5.41851e-07	0	0.00748669	0.0138762	MC
K01181	3.41557e-05	6.54168e-05	0.000127921	0.000205	0.00249255	NC
K01183	6.66975e-05	6.29434e-05	4.04746e-05	0.0194969	0.0306981	MC
K01185	3.47667e-05	4.34561e-05	7.1669e-05	0.0126829	0.0213285	NC
K01186	0.00010361	0.000134311	1.56782e-05	0.000263225	0.00249255	MET
K19778	0	5.16001e-07	0	0.00937793	0.0165389	MET
K02423	0	5.27733e-07	0	0.0185548	0.029433	MET
K01212	2.25761e-07	5.64168e-07	1.25883e-05	0.000388329	0.00249255	NC
K01215	5.39863e-06	4.76399e-06	3.23522e-05	0.000433985	0.00249255	NC
K15722	0	7.91198e-07	0	0.00150674	0.00456913	MET
K15723	9.05213e-08	1.59935e-06	0	0.0024218	0.00620937	MET
K15724	3.98565e-06	1.39411e-06	0	0.00162112	0.00481286	MC
K15725	1.06853e-05	7.2378e-05	2.32685e-06	6.50731e-05	0.00249255	MET
K15726	6.00325e-05	0.000120198	1.97441e-05	0.000504219	0.00261343	MET
K15727	7.11182e-05	0.000141002	2.00182e-06	0.000153394	0.00249255	MET
K02746	5.30504e-06	1.6613e-05	7.3306e-07	0.000322309	0.00249255	MET
K02747	2.18367e-06	1.26491e-05	8.79341e-07	0.0120644	0.0203542	MET
K05878	7.10763e-05	6.84303e-05	1.69749e-05	0.00141943	0.00445779	MC
K02742	2.08723e-07	9.66374e-07	0	0.00408466	0.00883937	MET
K01439	4.76697e-05	7.44897e-05	2.02885e-05	0.000322309	0.00249255	MET
K01438	7.6527e-05	5.31077e-05	0.000151298	0.000293833	0.00249255	NC
K00928	0.000292298	0.000329531	0.00030582	0.032468	0.0478767	MET
K00929	0.000261721	0.000159974	0.000110656	0.000504219	0.00261343	MC
K01433	2.26e-05	3.99992e-05	5.88094e-05	0.0145161	0.0238865	NC
K01436	7.40344e-06	2.1387e-06	2.05804e-06	0.0027326	0.00668479	MC
K18284	0	0	2.49974e-06	6.94598e-05	0.00249255	NC
K18285	1.11459e-05	2.75483e-05	1.00603e-05	0.021333	0.0331531	MET
K19273	0	0	9.51128e-07	0.00155373	0.00466048	NC
K02535	2.88685e-06	3.40844e-05	9.80847e-06	0.000164928	0.00249255	MET
K02421	1.02163e-05	2.54646e-05	3.6508e-05	0.00171216	0.0049695	NC
K05808	0.00016983	0.000204172	0.000146948	0.00148848	0.00455219	MET
K05539	6.0531e-06	4.23729e-06	3.703e-07	0.00180445	0.00512534	MC
K08296	4.054e-07	1.27334e-06	0	0.00367482	0.00816045	MET
K15836	1.55391e-07	7.02711e-07	0	0.00271057	0.00664831	MET
K19271	0.000433077	0.000326966	0.000366425	0.00373503	0.00822336	MC
K15830	1.18476e-07	8.63654e-07	0	0.000221415	0.00249255	MET
K15831	6.19129e-07	1.28136e-06	0	0.00458629	0.00958727	MET
K15833	4.63393e-07	1.15626e-06	0	0.00320929	0.00744159	MET
K19804	1.09091e-07	1.8892e-06	5.07428e-07	0.0017995	0.00512534	MET
K16137	5.20074e-06	4.51315e-06	0	0.000431878	0.00249255	MC
K08298	1.34959e-07	7.00895e-07	0	0.00367482	0.00816045	MET
K19802	5.81066e-05	4.07004e-05	6.81994e-05	0.0184535	0.0293622	NC
K02298	3.12821e-07	6.92827e-07	0	0.000779583	0.00309054	MET
K03582	4.51228e-07	5.75945e-06	1.81764e-07	0.00056567	0.00267644	MET
K03581	0.000201494	0.000177332	0.000353031	0.000341385	0.00249255	NC
K03587	0.00013224	0.000174213	5.28809e-05	0.000444972	0.00249255	MET
K03586	1.34119e-07	1.15487e-06	0	0.00525677	0.0105862	MET
K03585	0.000707762	0.000684372	0.000435049	0.00287271	0.00687272	MC
K03584	0.000267425	0.000271832	0.000123798	0.000443861	0.00249255	MET
K02562	3.97972e-07	1.64629e-06	0	0.00148826	0.00455219	MET
K03589	8.91463e-05	0.000137602	1.79678e-05	0.000224306	0.00249255	MET
K02566	3.8674e-05	3.25285e-05	7.03073e-05	0.0194969	0.0306981	NC
K02564	0.000536633	0.000411092	0.000343909	6.65538e-05	0.00249255	MC
K05245	4.1195e-07	9.80921e-07	0	0.000266378	0.00249255	MET
K01725	0	8.887e-07	0	0.00813569	0.0147148	MET
K03817	3.19749e-06	1.40565e-05	1.32067e-05	0.00417977	0.00896624	MET
K12963	0	8.01384e-07	0	0.00492503	0.0101187	MET
K01720	1.4694e-07	8.01776e-07	0	0.0024886	0.00628204	MET
K12961	6.93245e-07	1.61706e-06	0	0.000540978	0.00266327	MET
K12960	0.000112439	0.000111538	7.44122e-05	0.00997673	0.0173848	MC
K01729	4.93242e-07	4.45173e-06	6.14201e-06	0.0114187	0.0194123	NC
K01728	2.21518e-07	0	4.14541e-06	0.000125924	0.00249255	NC
K16905	3.32877e-06	4.2836e-06	6.90007e-08	0.00038042	0.00249255	MET
K16906	2.85432e-05	3.69254e-05	1.53939e-05	0.0161231	0.0260898	MET
K02848	2.5281e-06	1.53996e-06	0	0.0118147	0.0199836	MC
K14062	7.0072e-08	1.04186e-06	0	0.0017995	0.00512534	MET
K11529	1.13868e-05	2.1437e-05	2.5815e-05	0.00997673	0.0173848	NC
K14063	7.92915e-08	7.52762e-07	0	0.0168495	0.0270682	MET
K02189	6.299e-06	1.67094e-05	8.14979e-06	0.0127784	0.0214581	MET
K18197	2.3756e-08	0	2.9767e-05	5.4092e-05	0.00249255	NC
K14064	2.29632e-07	6.60236e-07	0	0.00271057	0.00664831	MET
K14742	0.000297959	0.000210794	0.000218033	0.00141943	0.00445779	MC
K14744	4.39187e-07	1.54341e-06	0	0.0115851	0.0196484	MET
K02182	1.86294e-07	7.92237e-07	0	0.00197291	0.00540698	MET
K14065	9.26127e-08	1.74798e-06	0	0.00417147	0.00896491	MET
K02364	4.9604e-07	2.5527e-06	0	0.000219158	0.00249255	MET
K13255	5.26499e-07	1.61399e-06	0	0.000269867	0.00249255	MET
K12369	5.63504e-07	1.38735e-06	0	0.000620291	0.00276145	MET
K12368	4.817e-07	1.51353e-06	0	0.000197924	0.00249255	MET
K03769	1.64711e-05	2.22406e-05	4.8531e-06	0.000322309	0.00249255	MET
K03767	7.02751e-06	3.91805e-06	5.65635e-07	0.00305035	0.00720178	MC
K03764	5.33937e-07	9.96741e-07	0	0.000620291	0.00276145	MET
K03762	4.15057e-07	1.24793e-06	0	0.000245457	0.00249255	MET
K03761	1.64654e-07	8.09388e-07	0	0.00230324	0.00599896	MET
K09457	0.000266597	0.00021631	0.000206488	0.0132667	0.0220012	MC
K09456	3.02389e-07	1.01897e-06	0	0.00332672	0.00760439	MET
K05708	1.8254e-07	8.10798e-07	0	0.00873702	0.0156209	MET
K02160	3.55549e-05	4.66951e-05	2.13954e-05	0.00111656	0.00380719	MET
K05879	5.23368e-05	5.42013e-05	1.35512e-05	0.000451697	0.00249255	MET
K03516	3.05869e-07	1.08839e-06	0	0.00458629	0.00958727	MET
K09458	0.000237252	0.000207187	0.000309901	0.000670491	0.00286976	NC
K16843	1.41003e-06	1.41501e-05	4.4444e-06	0.000767402	0.00309054	MET
K16844	1.40847e-06	1.73072e-05	5.26622e-06	0.0151842	0.0248285	MET
K16845	7.48819e-07	8.65945e-06	2.39333e-06	0.00482078	0.00996593	MET
K16846	9.8517e-07	2.12724e-05	5.48085e-06	0.00703048	0.0132016	MET
K02844	2.70225e-06	1.09457e-06	0	0.00100114	0.00357929	MC
K15773	2.54685e-08	3.8467e-06	2.80377e-06	0.000492699	0.00256798	MET
K03342	1.24509e-06	8.29207e-07	0	0.000374445	0.00249255	MC
K02847	2.97136e-07	1.39683e-06	0	0.000411053	0.00249255	MET
K15772	1.34219e-05	5.11714e-06	6.78e-05	0.000485661	0.00254836	NC
K02846	1.51893e-07	5.68073e-07	0	0.00116476	0.00388764	MET
K05877	0	6.36797e-07	0	0.00313113	0.00731119	MET
K15770	5.53422e-05	1.99789e-05	8.56177e-05	0.00245409	0.00624555	NC
K19171	3.93728e-06	6.26076e-05	1.21449e-05	0.000122488	0.00249255	MET
K07096	7.28666e-07	8.92434e-08	1.60379e-07	0.000364736	0.00249255	MC
K17465	3.00616e-07	1.49451e-06	0	0.00607057	0.0118419	MET
K17464	8.32192e-07	1.7799e-06	0	0.000586868	0.00267644	MET
K17467	2.02708e-06	6.29537e-06	4.44504e-08	7.38212e-05	0.00249255	MET
K17466	4.21036e-06	9.7996e-06	0	0.000247351	0.00249255	MET
K03169	0.000860876	0.000537194	0.000702874	0.000422213	0.00249255	MC
K03168	0.000333998	0.000340723	0.000291099	0.00614264	0.0119668	MET
K09985	0	5.81549e-06	0	0.00431362	0.00916081	MET
K09987	2.2143e-07	8.75276e-06	0	0.0168564	0.0270699	MET
K09989	2.28606e-05	1.77476e-05	4.21661e-05	0.00814786	0.0147197	NC
K04794	0	0	3.69183e-07	0.000572748	0.00267644	NC
K12297	2.57564e-07	8.20703e-07	0	0.000266378	0.00249255	MET
K02361	4.39638e-05	7.63114e-05	5.52193e-06	0.000205513	0.00249255	MET
K11922	4.91833e-08	9.44574e-07	0	0.00865521	0.0155222	MET
K11923	1.21139e-07	1.04353e-06	0	0.00601062	0.0117692	MET
K11920	1.86664e-07	9.38193e-07	0	0.0191471	0.0302596	MET
K11921	0.00021594	7.14756e-05	0.000167301	0.000833397	0.00323791	MC
K11926	3.2512e-07	1.60552e-06	0	0.00243189	0.00620937	MET
K11927	5.58883e-05	0.0001351	9.72288e-06	0.000123102	0.00249255	MET
K11924	7.5982e-08	1.07123e-06	0	0.0015374	0.00463504	MET
K11925	1.58092e-07	1.05354e-06	0	0.00216944	0.00575641	MET
K02363	4.72045e-07	1.86006e-06	0	0.000343561	0.00249255	MET
K18866	1.7077e-05	1.12537e-05	3.98871e-05	0.00134683	0.00429772	NC
K17992	2.70455e-05	3.29254e-05	1.99043e-06	0.000377289	0.00249255	MET
K18862	0	1.16101e-06	0	0.00431362	0.00916081	MET
K07560	0.000227001	0.00023591	0.000295439	0.0271196	0.0406576	NC
K11031	0	2.71982e-05	0	0.000154787	0.00249255	MET
K07262	3.48371e-06	1.71804e-06	5.86539e-07	0.00311976	0.00731119	MC
K07263	0.000325394	0.000238586	0.000242347	0.013004	0.0217509	MC
K07261	4.31025e-08	6.47781e-07	0	0.0027846	0.00671381	MET
K07264	2.69452e-07	1.56072e-06	0	0.000163123	0.00249255	MET
K07265	2.69027e-07	7.14842e-07	1.71681e-06	0.00830034	0.0149836	NC
K07269	3.71996e-07	1.11895e-06	0	0.00213759	0.00572393	MET
K05780	2.16712e-06	9.02207e-06	0	0.000148961	0.00249255	MET
K04940	7.4133e-06	8.84968e-06	3.83463e-07	0.00144088	0.00450698	MET
K02167	4.55401e-07	7.01761e-07	0	0.00599885	0.0117692	MET
K10975	1.56519e-07	7.39849e-07	0	0.00102116	0.00361549	MET
K06198	8.09325e-06	9.37006e-06	3.35979e-07	0.00138735	0.00439249	MET
K06197	0	3.89898e-07	0	0.0131939	0.0220012	MET
K06196	2.92344e-05	3.26446e-05	5.99556e-06	0.00067723	0.00288564	MET
K06195	0	1.36329e-06	0	0.00813569	0.0147148	MET
K06194	3.22404e-07	8.23904e-07	0	0.000222711	0.00249255	MET
K06192	2.66248e-07	1.10532e-06	0	0.00150055	0.00455629	MET
K06190	4.14065e-06	2.18324e-06	4.86929e-07	0.00258637	0.00647285	MC
K11105	8.22208e-05	0.000158182	0.00013292	0.00327152	0.00752982	MET
K11106	2.30021e-07	1.05616e-06	0	0.00150055	0.00455629	MET
K11103	4.15535e-06	2.17143e-06	6.74113e-07	0.00483197	0.00997142	MC
K10986	0	2.28506e-06	2.0993e-06	0.00508692	0.010398	MET
K07862	7.45339e-06	2.22465e-05	1.32694e-05	0.00871683	0.0155908	MET
K10984	1.93103e-06	1.66997e-05	5.91074e-06	0.00784797	0.0143332	MET
K01118	6.14126e-06	5.70003e-06	6.34398e-07	0.000451697	0.00249255	MC
K00666	9.4839e-05	0.000108865	2.56146e-05	0.000322309	0.00249255	MET
K01119	0.000171772	0.00012797	0.000109951	0.0132667	0.0220012	MC
K07741	2.50162e-05	1.37718e-05	2.1134e-06	0.00564209	0.0112265	MC
K00661	0.000361808	0.000274442	0.000161491	0.000263225	0.00249255	MC
K04770	2.32656e-07	1.04109e-06	0	0.00159052	0.00474273	MET
K06995	0	0	5.13412e-07	0.000445085	0.00249255	NC
K07469	1.52182e-06	2.77554e-07	6.29415e-07	0.0162445	0.0262135	MC
K10857	0	1.11563e-06	0	0.0169824	0.0272442	MET
[truncated: 1,181 more rows]

## Sheet: Sheet2
Additional file 5-2 Top 10 KO on LDA
KO ID	Description	LDA	Checked by ANOVA	Group
K12373	hexosaminidase [EC:3.2.1.52]	3.65642	pass	MC
K05349	beta-glucosidase [EC:3.2.1.21]	3.61545	pass	MC
K06180	23S rRNA pseudouridine1911/1915/1917 synthase [EC:5.4.99.23]	3.45649	fail	MC
K03169	DNA topoisomerase III [EC:5.99.1.2]	3.42628	fail	MC
K06889	uncharacterized protein	3.39073	fail	MC
K03585	membrane fusion protein, multidrug efflux system	3.36567	fail	MC
K01897	long-chain acyl-CoA synthetase [EC:6.2.1.3]	3.35214	fail	MC
K03100	signal peptidase I [EC:3.4.21.89]	3.34133	pass	MC
K02428	XTP/dITP diphosphohydrolase [EC:3.6.1.66]	3.30881	fail	MC
K01915	glutamine synthetase [EC:6.3.1.2]	3.30067	fail	MC
K03088	RNA polymerase sigma-70 factor, ECF subfamily	4.06636	pass	MET
K03424	TatD DNase family protein [EC:3.1.21.-]	3.21658	fail	MET
K01091	phosphoglycolate phosphatase [EC:3.1.3.18]	3.17372	fail	MET
K07496	putative transposase	3.15459	pass	MET
K00640	serine O-acetyltransferase [EC:2.3.1.30]	3.14871	fail	MET
K07240	chromate transporter	3.13608	fail	MET
K01424	L-asparaginase [EC:3.5.1.1]	3.09602	fail	MET
K03624	transcription elongation factor GreA	3.07238	fail	MET
K07491	putative transposase	3.05727	fail	MET
K01714	4-hydroxy-tetrahydrodipicolinate synthase [EC:4.3.3.7]	3.05683	fail	MET
K02003	putative ABC transport system ATP-binding protein	3.83505	pass	NC
K06147	ATP-binding cassette, subfamily B, bacterial	3.7826	pass	NC
K01990	ABC-2 type transport system ATP-binding protein	3.7516	pass	NC
K02004	putative ABC transport system permease protein	3.68903	fail	NC
K03496	chromosome partitioning protein	3.65642	pass	NC
K07133	uncharacterized protein	3.58188	pass	NC
K03406	methyl-accepting chemotaxis protein	3.54017	pass	NC
K00558	DNA (cytosine-5)-methyltransferase 1 [EC:2.1.1.37]	3.52975	pass	NC
K03497	chromosome partitioning protein, ParB family	3.45644	fail	NC
K03655	ATP-dependent DNA helicase RecG [EC:3.6.4.12]	3.43299	fail	NC
Note: pass represented adjusted P-value from ANOVA < 0.05.
